# Supplementary material
Source: PubMed Central journal article supplement (PMC6380958)
Supplement: NIHMS1519018-supplement-002328_-_Supplemental_Material.pdf [file NIHMS1519018-supplement-002328_-_Supplemental_Material.pdf]

# Supplemental Material

## Methods

### Human material

Biopsies on HCM patients were obtained as septal myomectomy specimens. Control samples were obtained from donor hearts not used for transplantation. Mutation and clinical data of patients are given in Table 1.

### RNA sequencing

We performed RNA-seq on twenty-two human myocardial samples, eleven of which on diseased (HCM) and eleven in non-diseased state (Table 1, Supplemental Table 2). Prior to chromatin and RNA isolation, all frozen cardiac tissue biopsies were sectioned at the thickness of 10 $\mu$ m. RNA was isolated using Qiagen AllPrep Micro Kit according to the manufacturer's instructions. Sample quality assessed using the 2100 Bioanalyzer with a RNA 6000 Pico Kit (Agilent, Supplemental Table 2). After the selection of mRNA, libraries were prepared using the NEXTrflex<sup>TM</sup> Rapid RNA-seq Kit (Bio Scientific). Libraries were sequenced on the Nextseq500 platform (Illumina), producing single end reads of 75bp. Reads were aligned to the human reference genome GRCh37 using STAR v2.4.2a<sup>1</sup>. Picard's AddOrReplaceReadGroups v1.98 ( <http://broadinstitute.github.io/picard/> ) was used to add read groups to the BAM files, which were sorted with Sambamba v0.4.5<sup>2</sup> and transcript abundances were quantified with HTSeq-count v0.6.1p1<sup>3</sup> using the union mode. Subsequently, reads per kilobase million reads sequenced (RPKMs) were calculated with edgeR's RPKM function<sup>4</sup> (Supplemental Table 3). Genes with low counts (whose sum of all counts across samples included in the analysis was < 10) were removed. In order to obtain a

list of genes expressed in either HCM or control group, we categorized transcripts that are expressed as having  $>0.5$  RPKM averaged across samples of each group (expected reads per kilobase of transcripts per million fragments sequenced). In order to obtain a list of differentially expressed genes between HCM and controls at  $FDR < 0.05$ , we employed Deseq2 v1.10.1 package<sup>5</sup>. We calculated  $p$ -values using Wald statistics and corrected for multiple testing using the Benjamini-Hochberg method. We retrieved transcription start sites (TSS) of the obtained genes from Ensembl Genes 89 using Biomart (Human genes GRCh37.13)<sup>6</sup>. We defined promoter regions as ranging from -2500 to +2500 base-pairs (bp) from the TSS. Differentially regulated genes can be found in Supplemental Table 4.

### **Chromatin Immunoprecipitation and Sequencing**

Chromatin immunoprecipitation and sequencing (ChIP-seq) using H3K27ac mark was performed on human myocardial samples from fourteen HCM patients and four control donors, partially matching the samples included in the RNA-seq experiment described above (Table 1). Chromatin was isolated from each sample using the MAGnify™ Chromatin Immunoprecipitation System kit (Life Technologies) according to the manufacturer's instructions. Immunoprecipitations were performed with antibody H3K27ac (ab4729, Abcam) for ChIP-seq as described previously<sup>7</sup>. ChIP DNA Clean & Concentrator kit (Zymo Research) was used to purify captured DNA fragments. Libraries were prepared using the NEXTflex™ Rapid DNA Sequencing Kit (Bioo Scientific) and sequenced on Illumina NextSeq500 sequencer. Alignment to the human reference genome (hg19) was performed using BWA v0.7.5a<sup>8</sup>. Duplicated, unmapped reads and reads with mapping quality less than 5 were removed using Samtools v1.3<sup>9</sup>. Peak calling was performed using MACS v 2.1.0<sup>10</sup> using the respective input samples, `-gsize=hg -nomodel` parameters, and estimated fragment sizes (`-extsize`) predicted by PhantomPeakQualTools v1.1<sup>11</sup>. Epigenomic profiles were compared using DiffBind v2.2.12<sup>12</sup> to identify enhancer peaks that are quantitatively different

(FDR<0.05, Deseq2 algorithm) between control and HCM populations. Consensus peaksets were formed by peaks that overlapped in at least two samples. Differentially acetylated regions can be found in Supplemental Table 5.

### **Super-Enhancers**

We identified super-enhancer regions on the 14 HCM H3K27ac datasets described previously by employing ROSE algorithm<sup>13</sup> using a stitching distance of 12.5kb. Peaks fully contained in the region spanning 2500bp upstream and downstream of an annotated TSS were excluded. HCM-specific super-enhancers were defined as super-enhancer in HCM not overlapping super-enhancers in the control septum samples. These can be found in Supplemental Table 6. BEDtools v2.17.0<sup>14</sup> and BEDOPS v2.4.35<sup>15</sup> were used for manipulation of bed-files. Super-enhancer regions from non-diseased human left ventricle (LV) were retrieved from the Super-Enhancer Archive (SEA)<sup>16</sup>.

### **Open Chromatin**

All datasets of regulatory features generated in this study were further narrowed down to regions overlapping maps of open chromatin in heart, in order to retain only the sequences accessible to transcription factors (TF). We retrieved peaks from the “open chromatin” tracks from ENCODE portal in heart tissue. These datasets were generated using DNaseI hypersensitivity or Formaldehyde-Assisted Isolation of Regulatory Elements (FAIRE) assays. For the DNaseI assays, 3 biological replicates from 3 non-diseased adult hearts were included. For the FAIRE assays, 2 biological replicates from 2 non-diseased adult hearts were included. A peaks file with GEO accession GSM1008559, identified as Heart\_OC, was downloaded from UCSC Genome Browser (<https://genome.ucsc.edu/>).

## **Integrative analysis and statistical enrichment of QRS-associated variants on specific regulatory regions**

We used FUMA<sup>17</sup> to expand the set of 52 lead SNPs to candidate SNPs in LD, using the following parameters:  $p$ -value of lead SNPs  $<1 \times 10^{-8}$ , reference panel population 1000G Phase3 EUR, minor allele frequency  $\geq 0.01$ , maximum distance between LD blocks to merge into a locus  $< 1000\text{kb}$ . We generated sets of LD variants in the following  $r^2$  windows:  $0.05 \leq r^2 < 0.1$ ,  $0.1 \leq r^2 < 0.2$ ,  $0.2 \leq r^2 < 0.3$ ,  $0.3 \leq r^2 < 0.4$ ,  $0.4 \leq r^2 < 0.5$ ,  $0.5 \leq r^2 < 0.6$ ,  $0.6 \leq r^2 < 0.7$ ,  $0.7 \leq r^2 < 0.8$ ,  $0.8 \leq r^2 < 0.9$  and  $0.9 \leq r^2 \leq 1$ . We used bedtools v2.19.1<sup>14</sup> to identify candidate variants from the generated sets that overlap with differential regulatory regions of interest, including HCM-specific super-enhancers, LV-specific super-enhancers, regions differentially acetylated between HCM patients versus controls, and promoter regions of genes differentially expressed between HCM patients and controls. A SNP falling within coordinates of regulatory regions of interest was considered as overlapping SNP. To assess the significance and enrichment of the amount of overlaps found, we sampled 10,000 randomized sets of SNPs from the total set of HapMap phase 2 CEU SNPs<sup>18</sup>. HapMap SNPs were split into 5 equal minor allele frequency (MAF) bins ranging from  $0 \leq \text{MAF} \leq 0.5$  and into 2 bins of distance (intronic and intergenic SNPs). Background distribution was sampled from these bins in order to account for similar MAF and distance to gene. We calculated the  $p$ -value using binominal cumulative distribution function  $b(x; n, p)$  (as done previously<sup>19, 20</sup>) using R<sup>21</sup> `pbinom()` function. We carried out permutation tests using overlaps with all promoters/enhancer elements identified in HCM and control hearts, and with regions resulting from differential analysis between HCM patients and controls.

## Gene mapping

We used FUMA<sup>17</sup> for eQTL mapping, linking SNPs to genes whose expression is likely affected up to 1 Mb (cis-eQTL). Since eQTLs are highly tissue specific, LV was selected from GTEx portal. We defined significant eQTLs as  $FDR \leq 0.05$ . The gene FDR is pre-calculated by GTEx and every gene-tissue pair has a defined p-value threshold for eQTLs based on permutation<sup>17</sup>. eQTL maximum p-value was defined as  $\leq 1 \times 10^{-3}$ . In addition, we identified which of the three closest genes to QRS-candidate causative variants overlapping differential regulatory elements were differentially expressed.

## Visualization of overlaps

All 4620 QRS-associated candidate SNPs (52 lead SNPs and variants in LD  $r^2 > 0.5$ ) were plotted on UCSC Genome Browser on Human GRCh37/hg19 assembly<sup>22</sup>. The following tracks were included in their full form (not filtered by open chromatin regions): down-regulated promoters in HCM versus controls, up-regulated promoters in HCM versus controls, down-acetylated regions in HCM versus controls, up-acetylated regions in HCM versus controls, super-enhancers specific to HCM (not overlapping super-enhancers found in the control group), LV super-enhancers from the Super-Enhancer Archive<sup>16</sup>. Finally, the heart DNase track from ENCODE<sup>23</sup>, showing the regions to which differential regulatory elements were further narrowed down as regions of transcription factor binding. The 74 variants overlapping regulatory elements affected in HCM overlapping open chromatin in heart and spread through 20 QRS-associated loci can be seen on Supplemental Figures 2 to 21. Resolution is set to 10kb or 20kb (information present in each figure). UCSC genes, a layered mark of H3K27ac on 7 cell-lines and a transcription factor track from ENCODE are also shown.

## Supplemental Figures and Tables

### Supplemental Figures

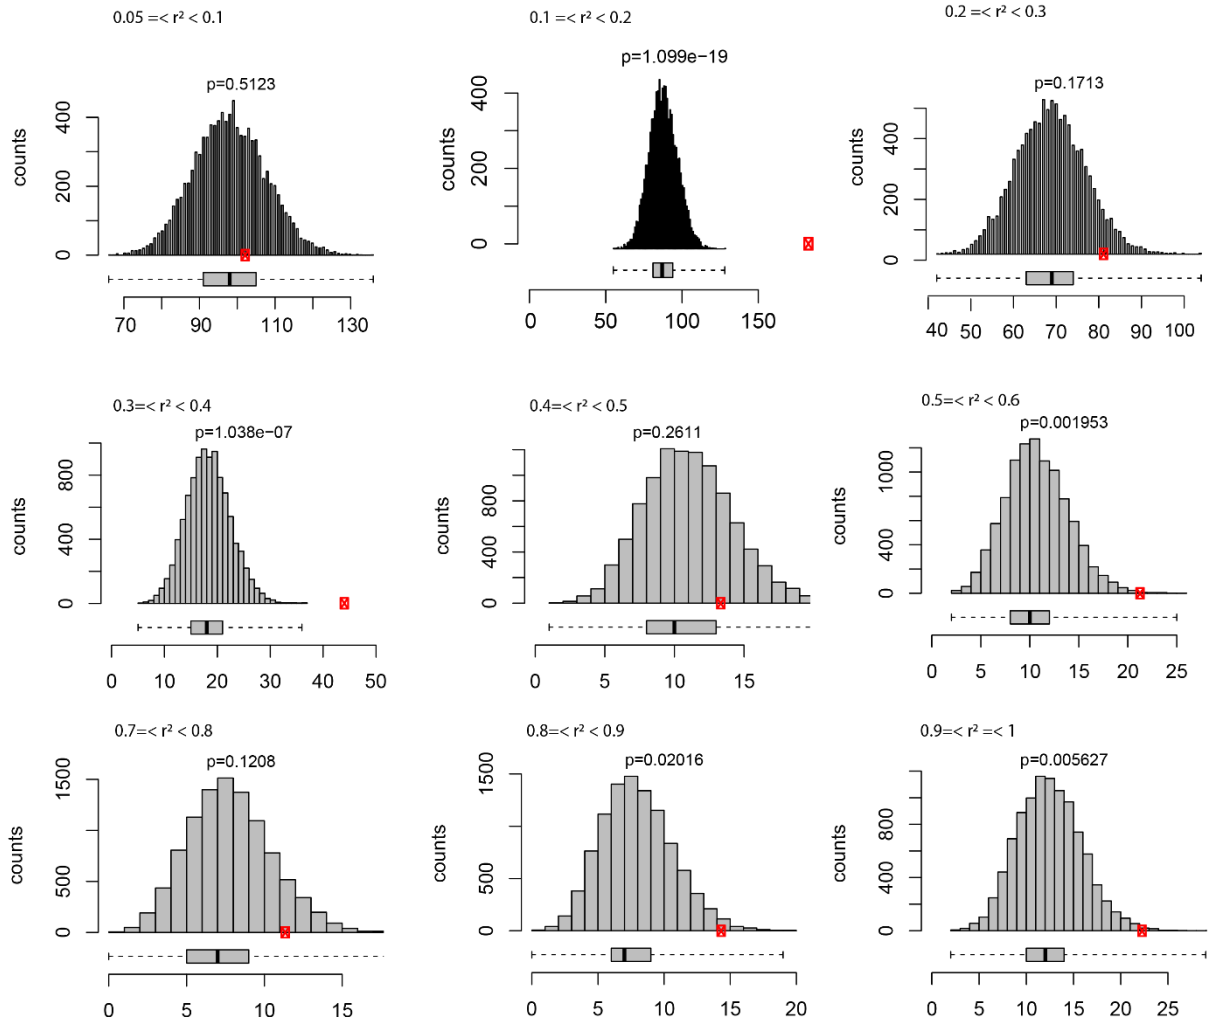

**Supplemental Figure 1.** Mean number of differential regulatory elements overlapping with QRS-associated loci (red circle) belonging to 9 windows of LD  $r^2$  values, compared with 10,000 matched control sets (gray bars).

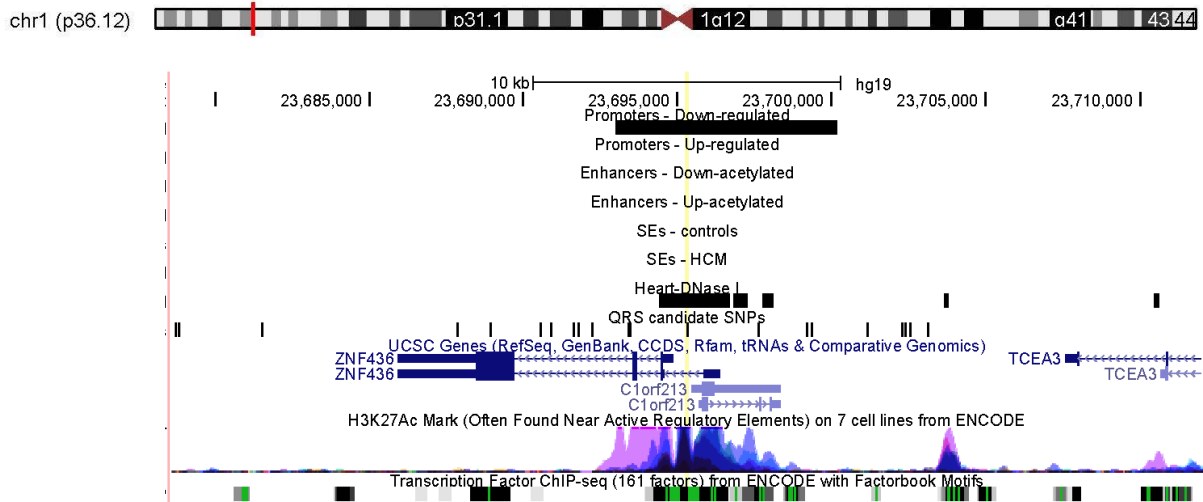

**Supplemental Figure 2.** Loci of lead QRS-associated SNP rs2849028, in which variant rs680386, in LD  $r^2=0.6$ , overlaps (in yellow) a down-regulated promoter on gene *ZNF436*.

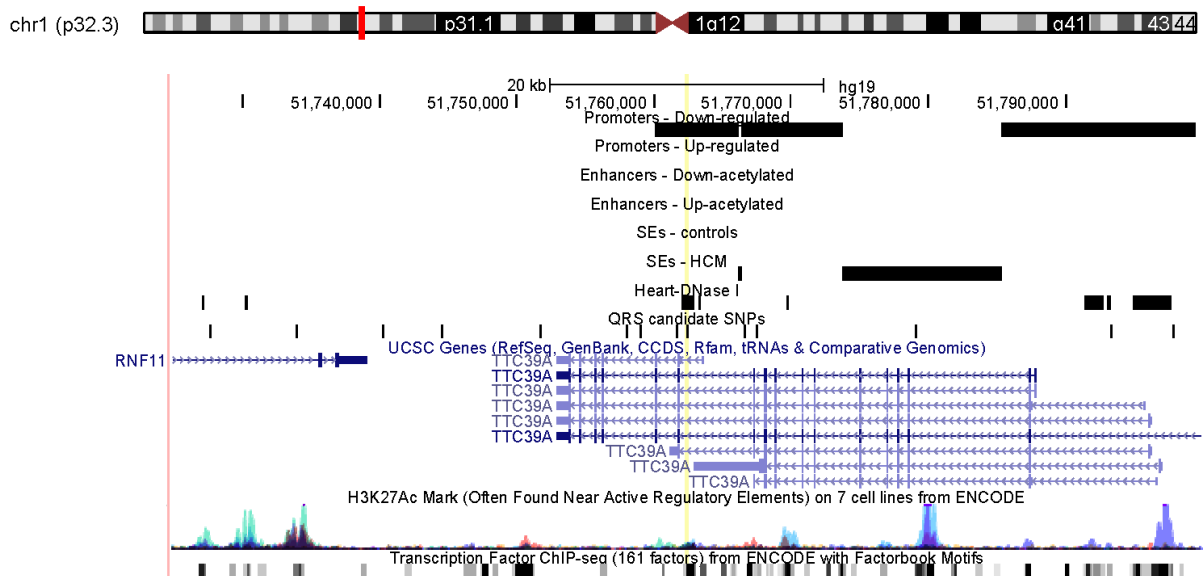

**Supplemental Figure 3.** Loci of lead QRS-associated SNP rs17391905, in which variant rs72694106, in LD  $r^2=0.6$ , overlaps (in yellow) a down-regulated promoter on gene *TTC39A*.

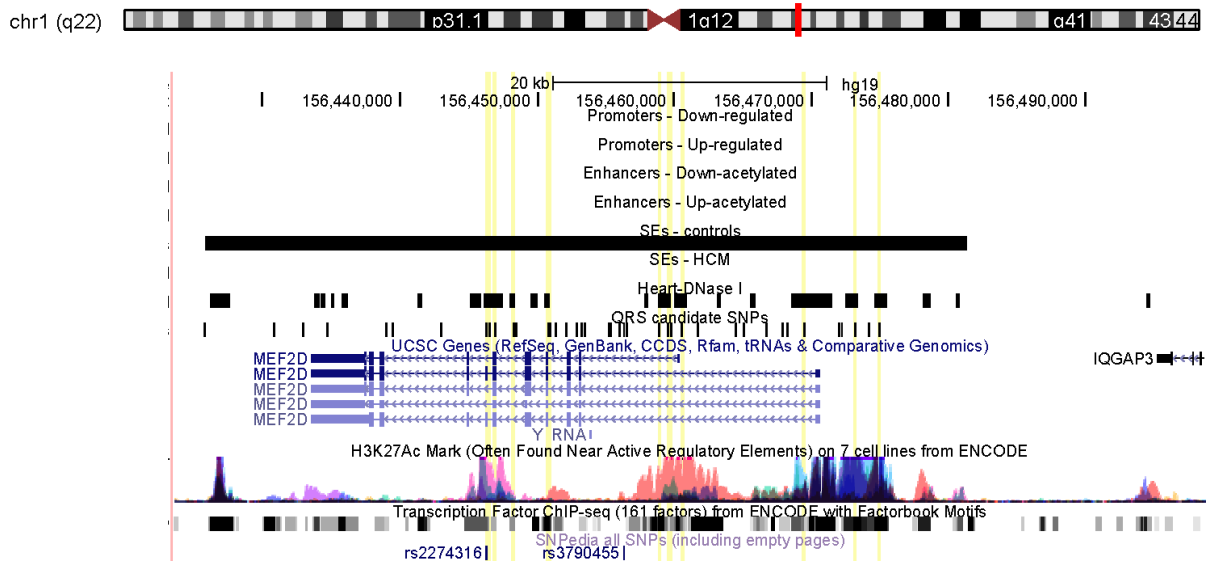

**Supplemental Figure 4.** Loci of lead QRS-associated SNP rs2274317, in which variants rs2274316, rs12131289, rs2274317, rs4450010, rs1185700, rs1925950, rs2274319, rs3790457, rs12038396, rs3790458, rs746527, rs3790461, rs12136856 and rs538050729, in LD  $r^2 > 0.6$ , overlap (in yellow) an LV super-enhancer.

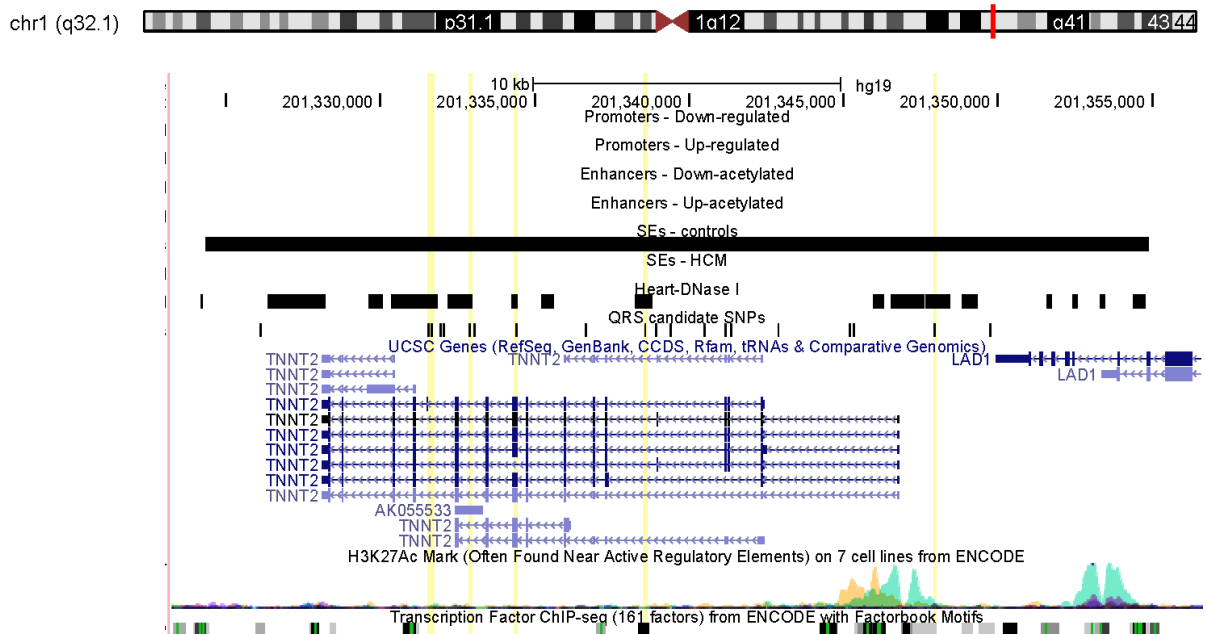

**Supplemental Figure 5.** Loci of lead QRS-associated SNP rs10920184, in which variants rs1104859, rs2365652, rs1892026, rs3729547, rs10800776, rs10920183 and rs4915232, in LD  $r^2 > 0.6$ , overlap (in yellow) an LV super-enhancer.



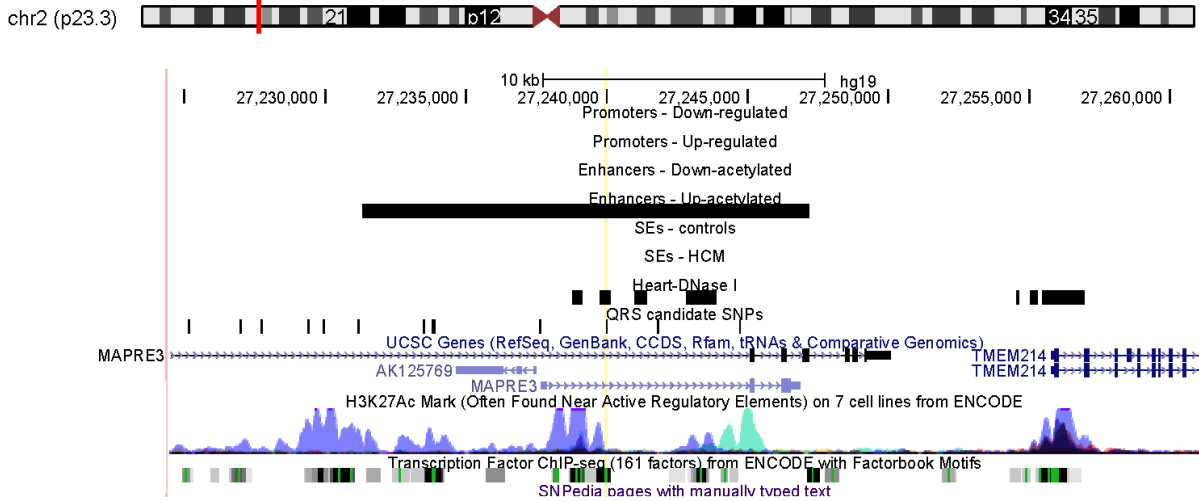

**Supplemental Figure 6a.** Loci of lead QRS-associated SNP rs6710065, in which variants rs2252860, rs2304337, in LD  $r^2 > 0.7$ , overlap (in yellow) an LV super-enhancer.

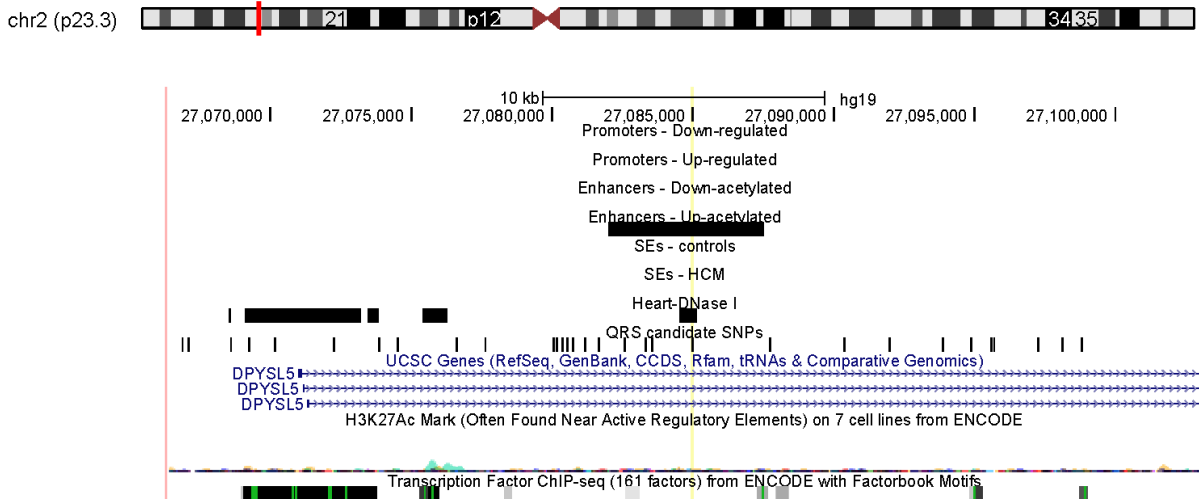

**Supplemental Figure 6b.** Loci of lead QRS-associated SNP rs6710065, in which variants rs34902032 and rs11677841, in LD  $r^2 > 0.5$ , overlap (in yellow) an up-acetylated enhancer.

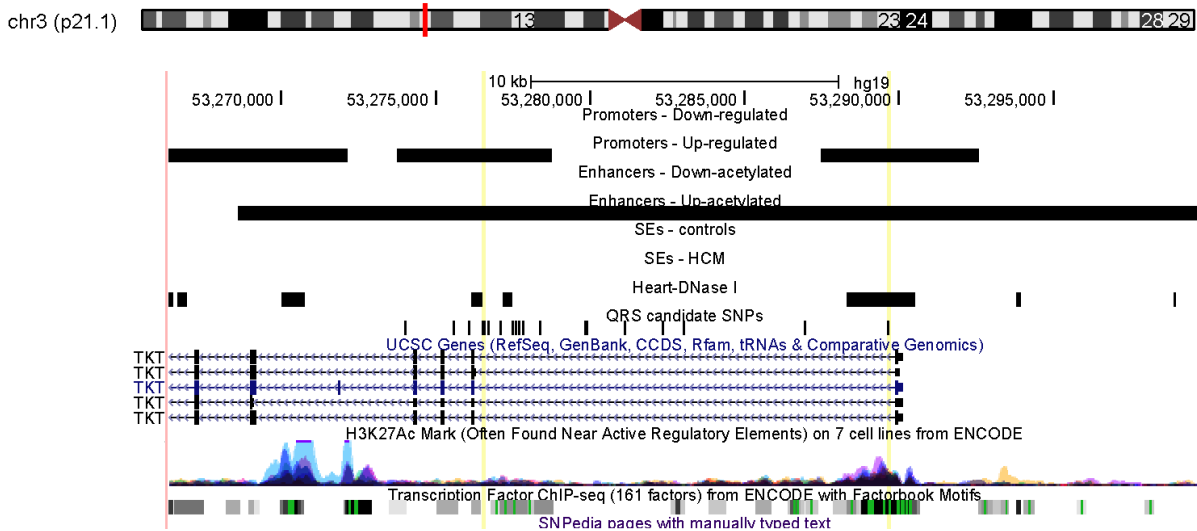

**Supplemental Figure 7.** Loci of lead QRS-associated SNP rs4687718, in which variants rs968702 and rs62256006, in LD  $r^2 > 0.6$ , overlap (in yellow) an up-regulated promoter on gene *TKT*, as well as up-acetylated regions.

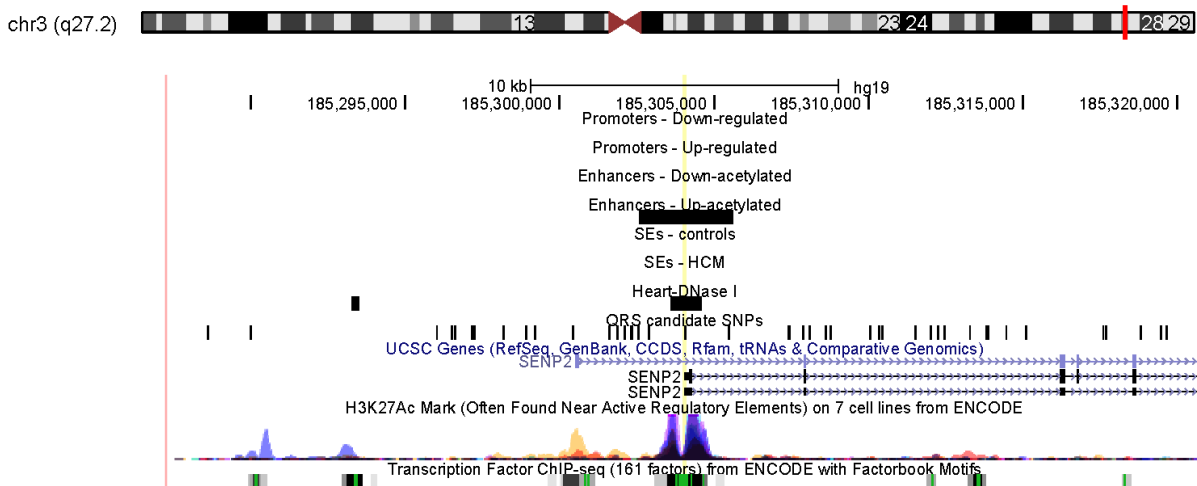

**Supplemental Figure 8.** Loci of lead QRS-associated SNP rs4687718, in which variants rs968702 and rs62256006, in LD  $r^2 > 0.6$ , overlap (in yellow) an up-regulated promoter as well as up-acetylated regions.

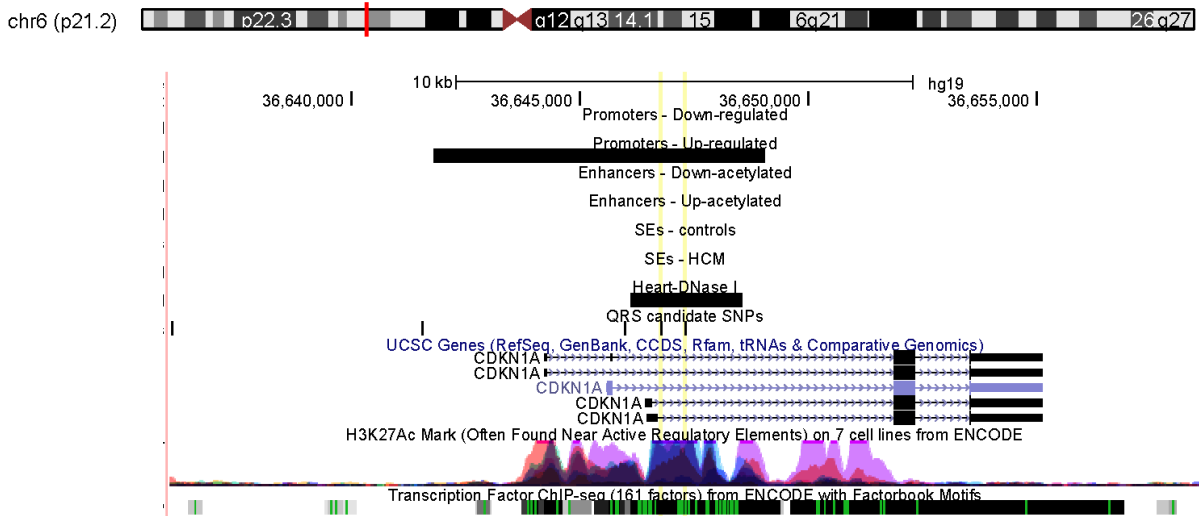

**Supplemental Figure 9.** Loci of lead QRS-associated SNP rs1321311, in which variants rs146170154 and rs3176326, in LD  $r^2 > 0.7$ , overlap (in yellow) an up-regulated on gene *CDKN1A*.

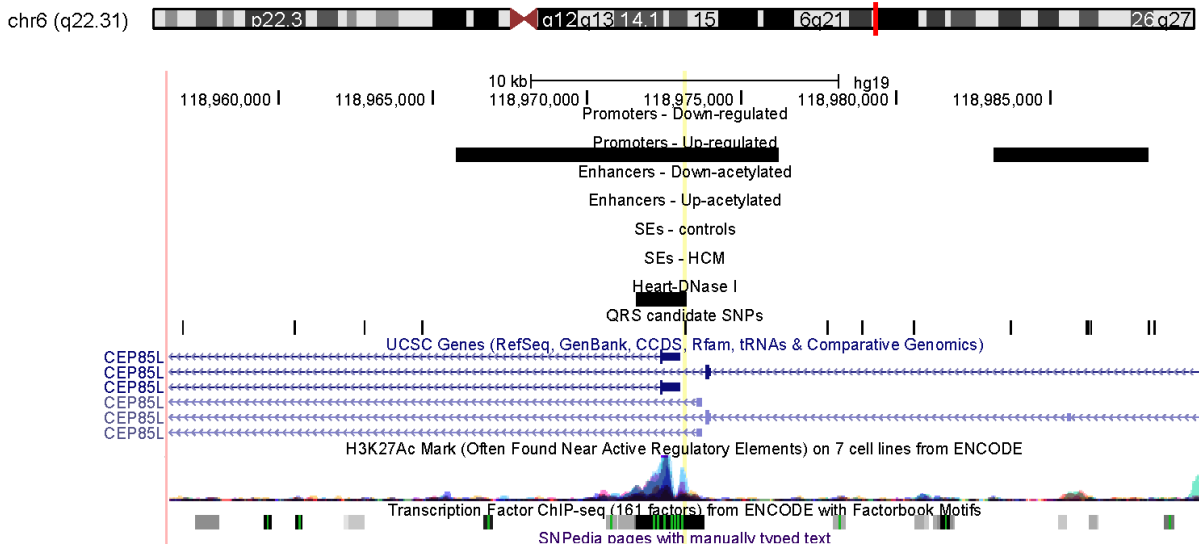

**Supplemental Figure 10.** Loci of lead QRS-associated SNP rs11153730, in which variant rs6913012, in LD  $r^2 = 0.7$ , overlap (in yellow) an up-regulated on gene *CEP85L*.

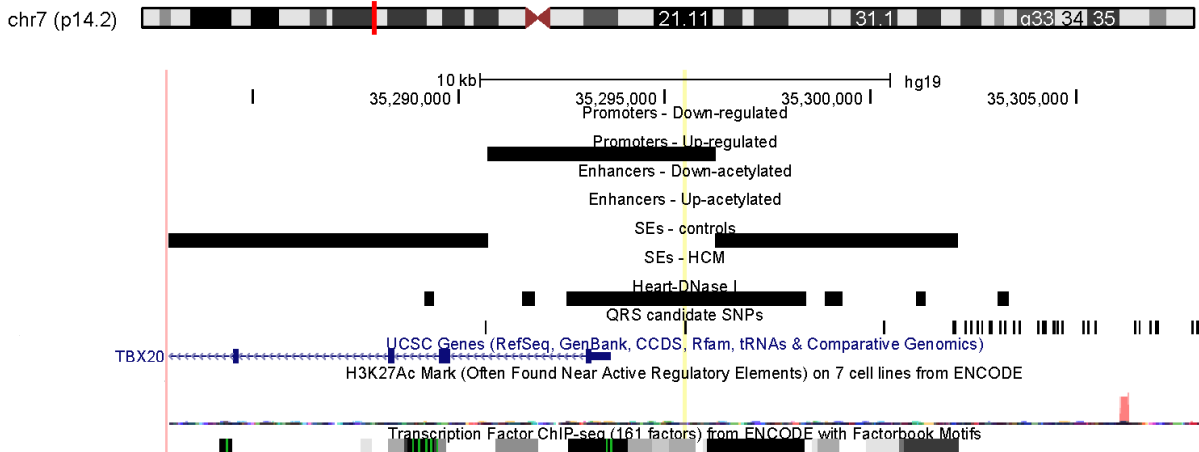

**Supplemental Figure 11.** Loci of lead QRS-associated SNP rs1419856, in which variant rs1003549, in LD  $r^2=0.7$ , overlap (in yellow) an up-regulated on gene *TBX20*.

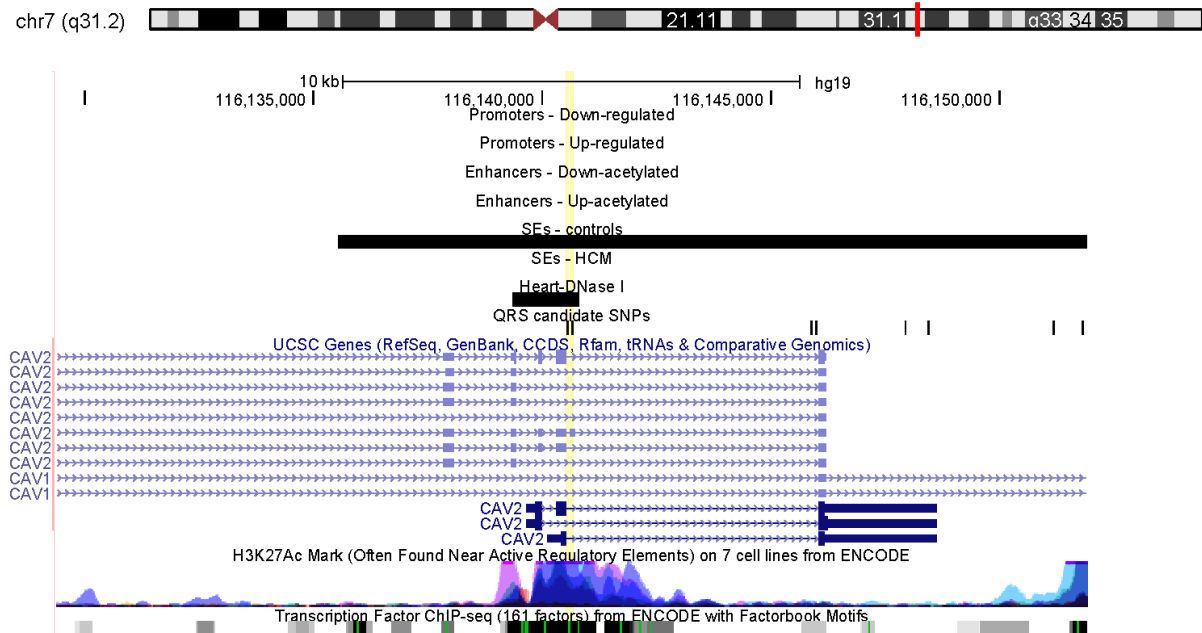

**Supplemental Figure 12.** Loci of lead QRS-associated SNP rs11773845, in which variants rs2270188 and rs2270189, in LD  $r^2=0.5$ , overlap (in yellow) an LV super-enhancer.

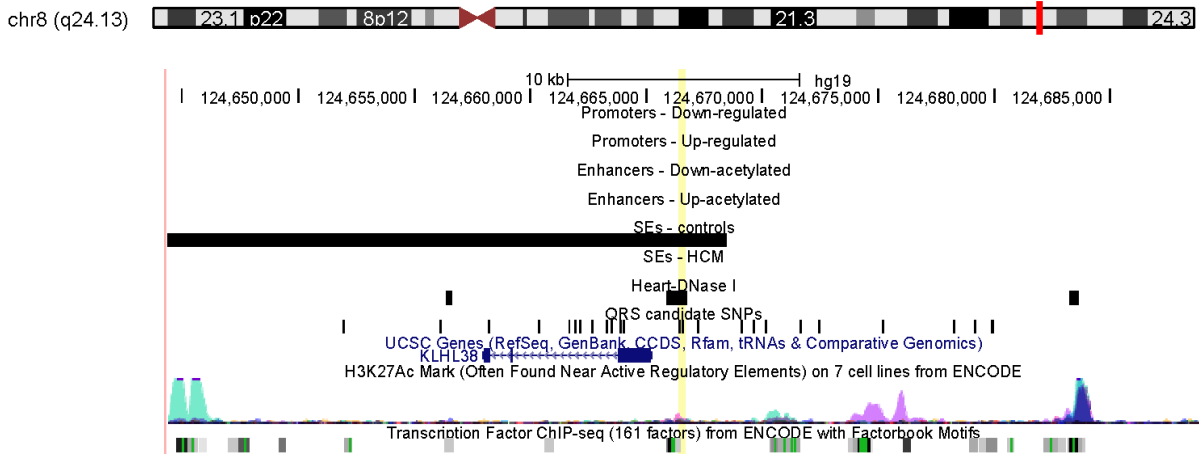

**Supplemental Figure 13.** Loci of lead QRS-associated SNP rs4367519, in which variant rs143950919, in LD  $r^2=1$ , as well as lead SNP rs4367519 itself, overlap (in yellow) an LV super-enhancer.

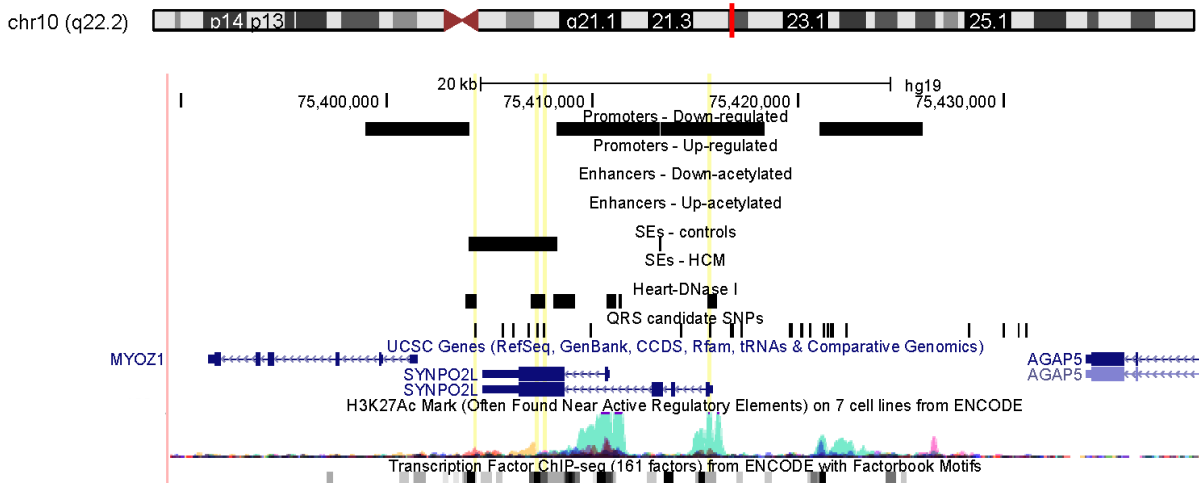

**Supplemental Figure 14.** Loci of lead QRS-associated SNP rs7099599, in which variants rs11000728, rs3812629 and rs4746139, in LD  $r^2=0.8$ , overlap (in yellow) an LV super-enhancer, while rs60632610, in LD  $r^2=0.9$ , overlaps the down-regulated promoter (and exon) region of *SYNPO2L*.

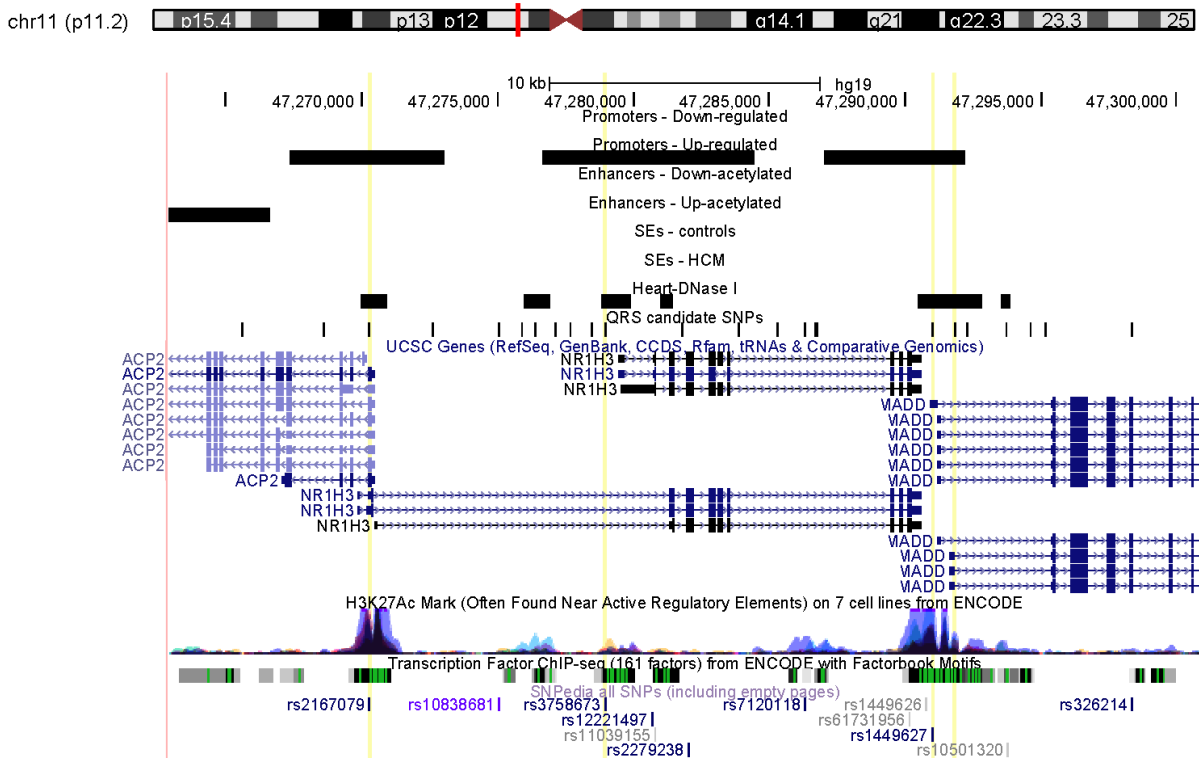

**Supplemental Figure 15a.** Loci of lead QRS-associated SNP rs2269434, in which variants rs2167079, rs3758673, rs1449627 and rs142960070, in LD  $r^2=0.8$ , overlap (in yellow) up-regulated promoter regions.

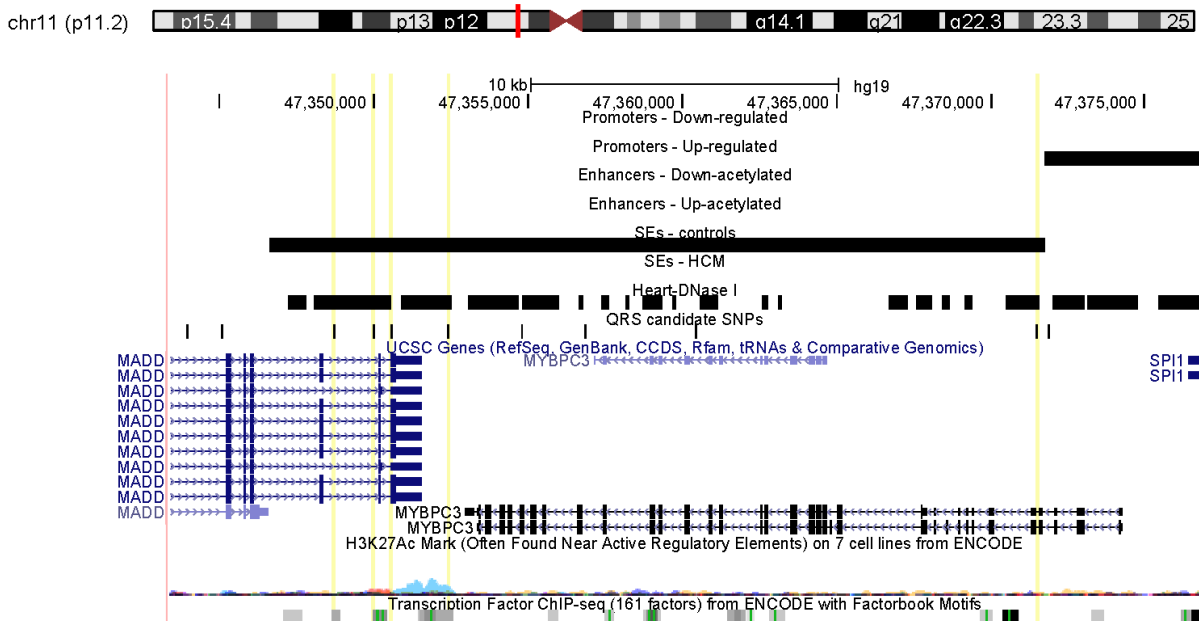

**Supplemental Figure 15b.** Loci of lead QRS-associated SNP rs2269434, in which variants rs3781622, rs753993, rs10838693, rs4752825 and rs11570050, in LD  $r^2>0.5$ , overlap (in yellow) an LV super-enhancer.

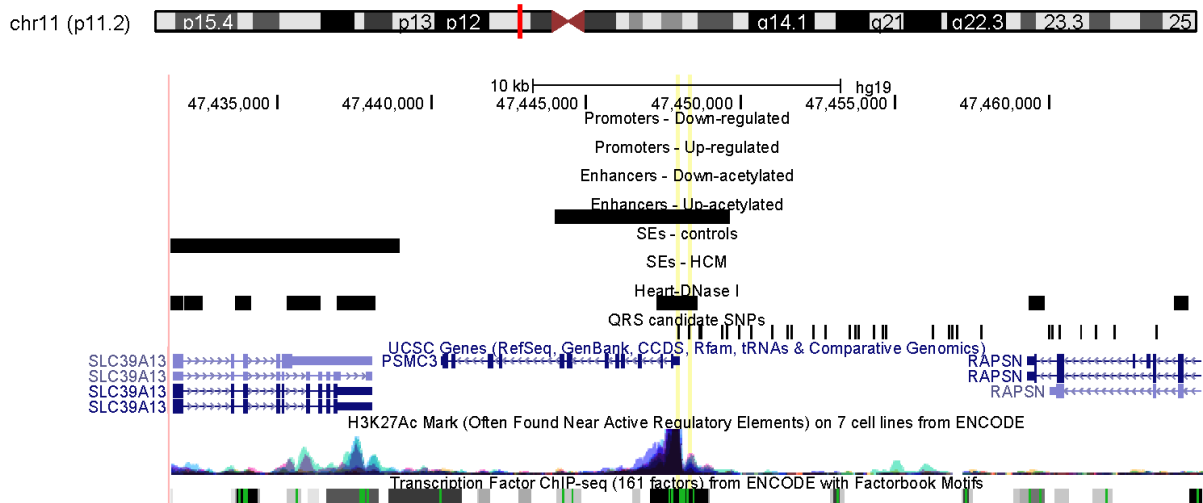

**Supplemental Figure 15c.** Loci of lead QRS-associated SNP rs2269434, in which variants rs7948705 and rs11307826, in LD  $r^2=0.6$ , overlap (in yellow) an up-acetylated region.

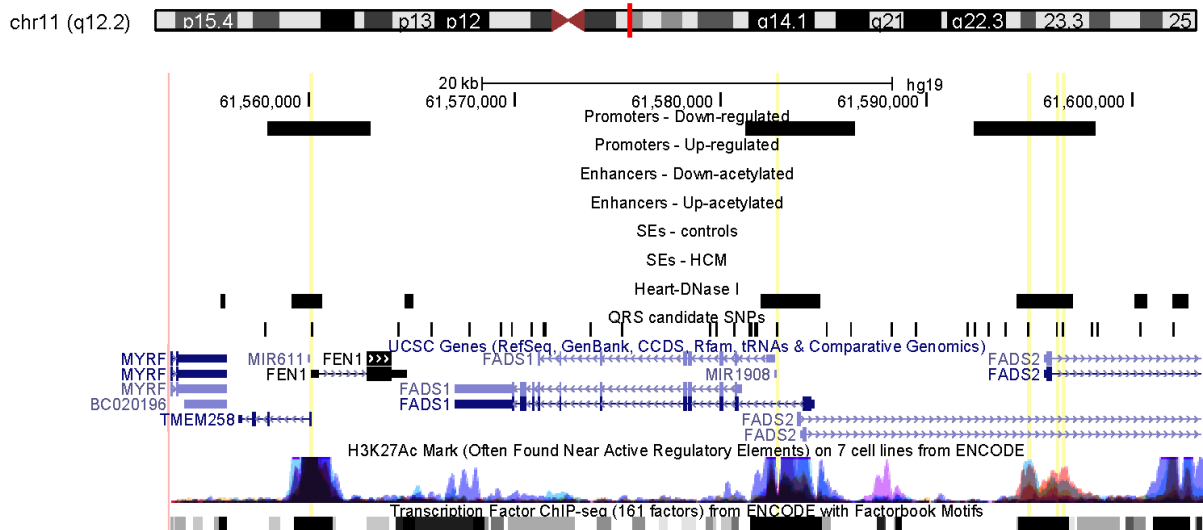

**Supplemental Figure 16.** Loci of lead QRS-associated SNP rs174577, in which variants rs174538, rs174561, rs3834458, rs5792235 and rs99780, in LD  $r^2>0.8$ , overlap (in yellow) up-regulated promoter regions.

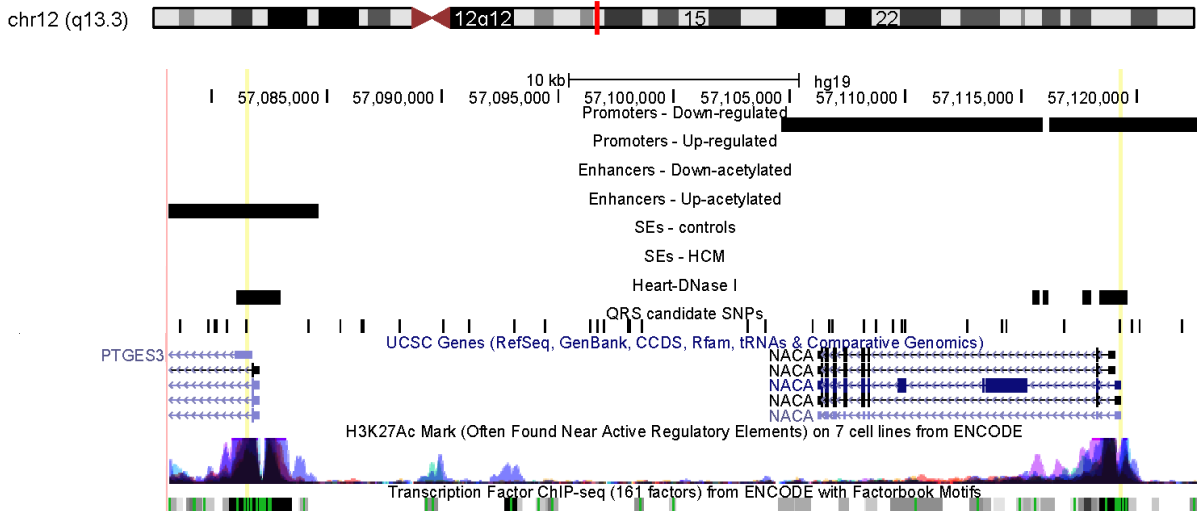

**Supplemental Figure 17.** Loci of lead QRS-associated SNP rs2926743, in which variants rs2958153, in LD  $r^2=0.9$ , overlaps (in yellow) an up-acetylated region, while rs3214051, in LD  $r^2=0.6$ , overlaps a down-regulated promoter.

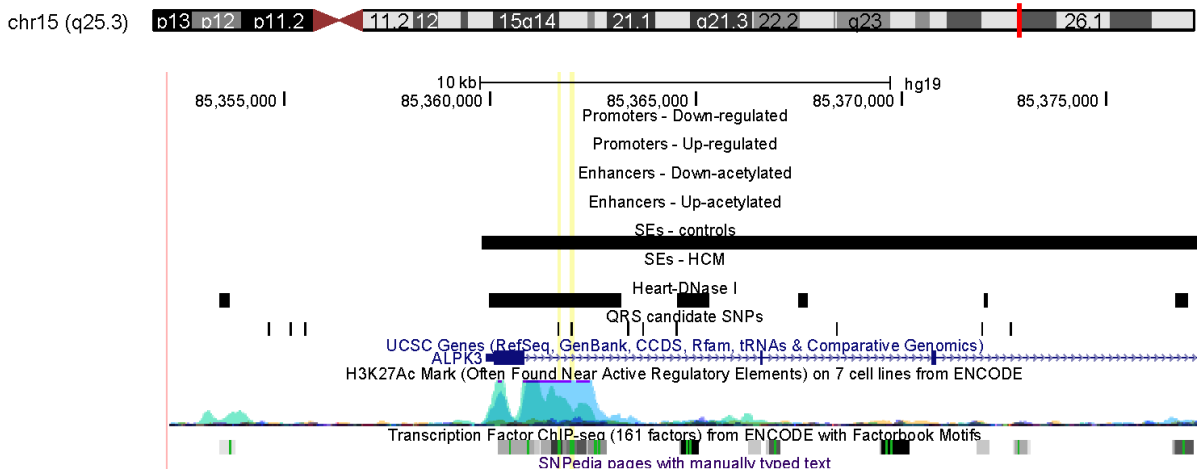

**Supplemental Figure 18.** Loci of lead QRS-associated SNP rs7183401, in which variants rs8039472, rs4633690, and rs2879828, in LD  $r^2>0.8$ , overlap (in yellow) an LV super-enhancer.



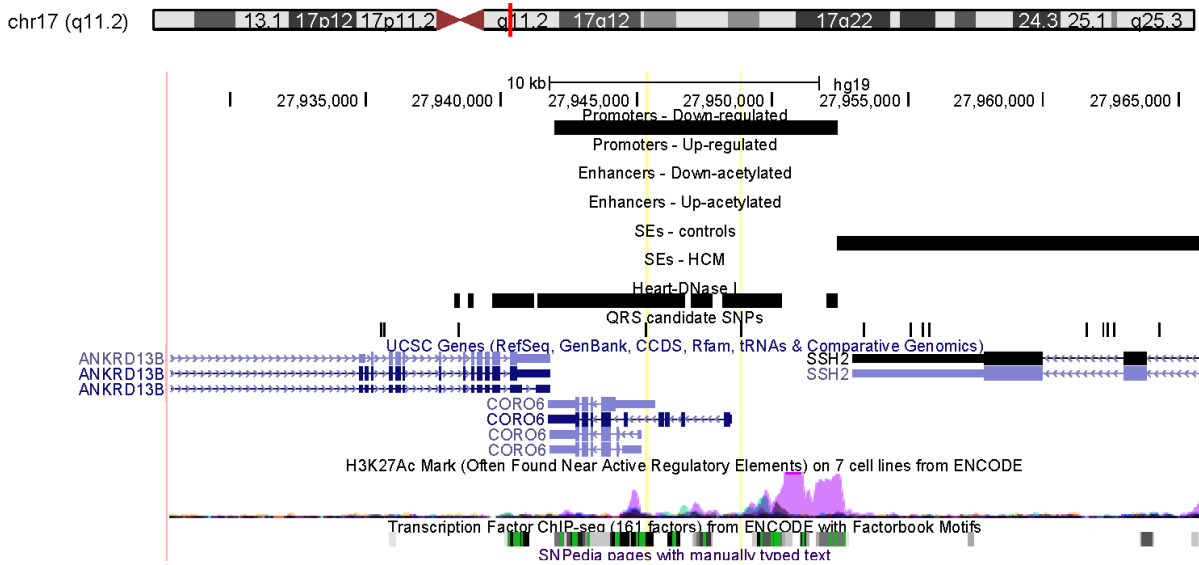

**Supplemental Figure 19a.** Loci of lead QRS-associated SNP rs7211246, in which variants rs871014 and rs3760456, in LD  $r^2 > 0.5$ , overlap (in yellow) an up-regulated promoter.

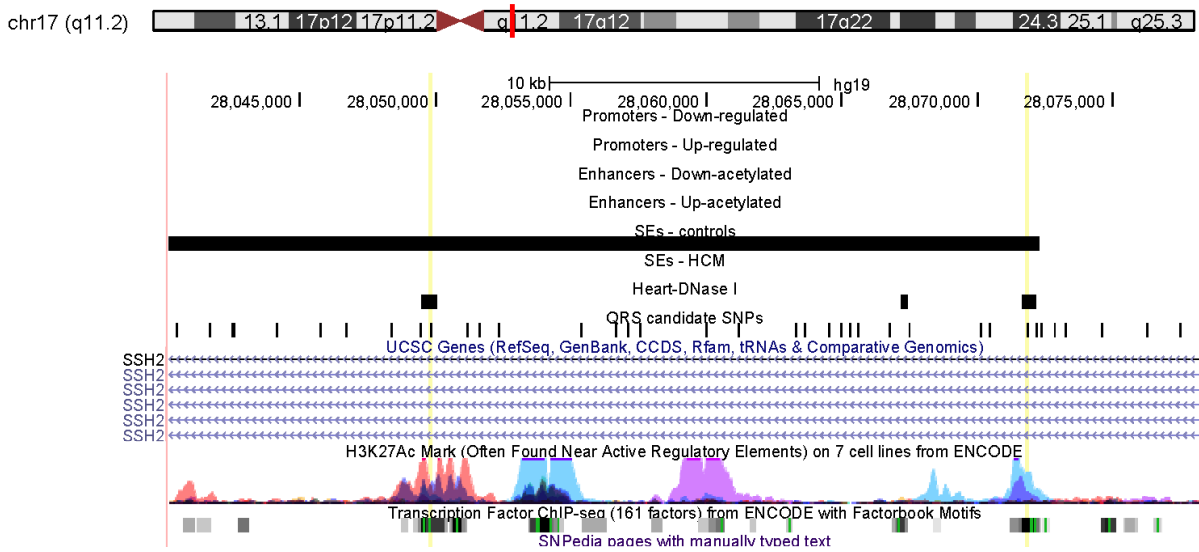

**Supplemental Figure 19b.** Loci of lead QRS-associated SNP rs7211246, in which variants rs2617865 and rs2628179, in LD  $r^2 > 0.7$ , overlap (in yellow) an LV super-enhancer.

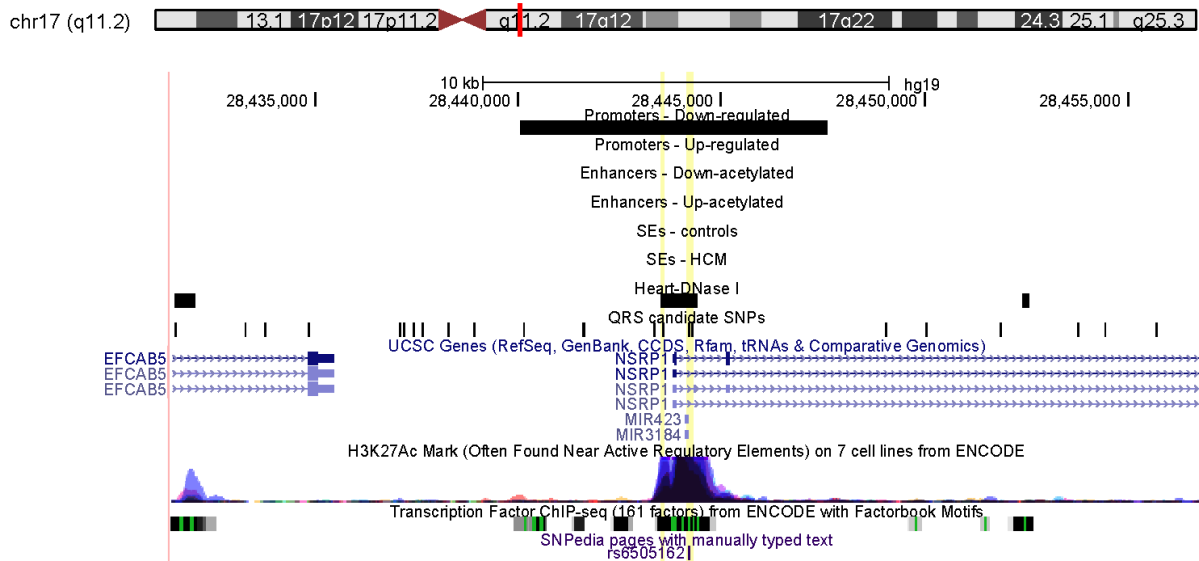

**Supplemental Figure 19c.** Loci of lead QRS-associated SNP rs7211246, in which variants rs4795529, rs6505162 and rs8067576, in LD  $r^2 > 0.8$ , overlap (in yellow) an LV super-enhancer.

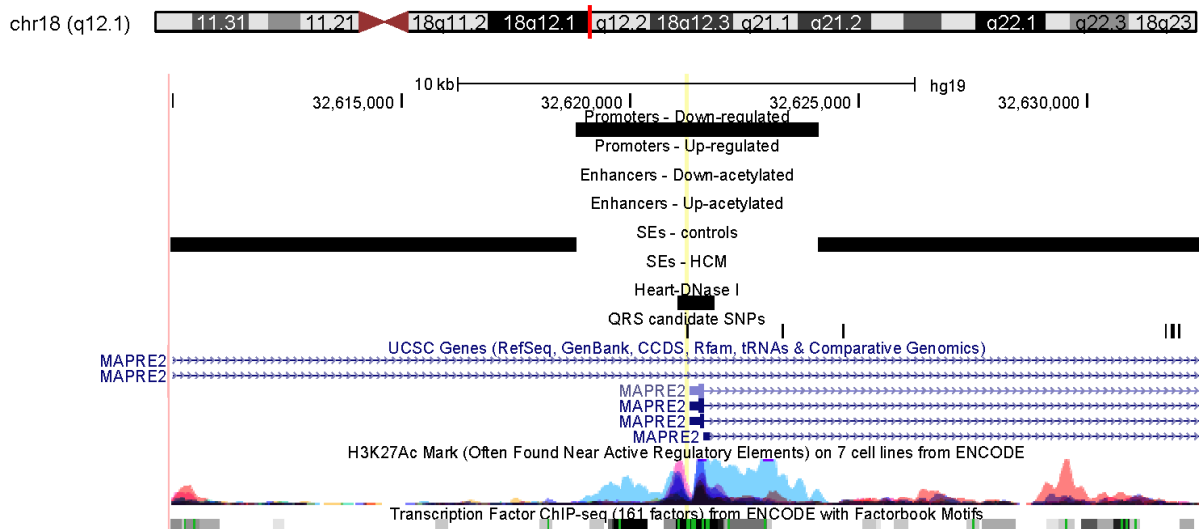

**Supplemental Figure 20.** Loci of lead QRS-associated SNP rs617759, in which variants rs530081, in LD  $r^2 = 0.6$ , overlaps (in yellow) a down-regulated promoter on gene *MAPRE2*.

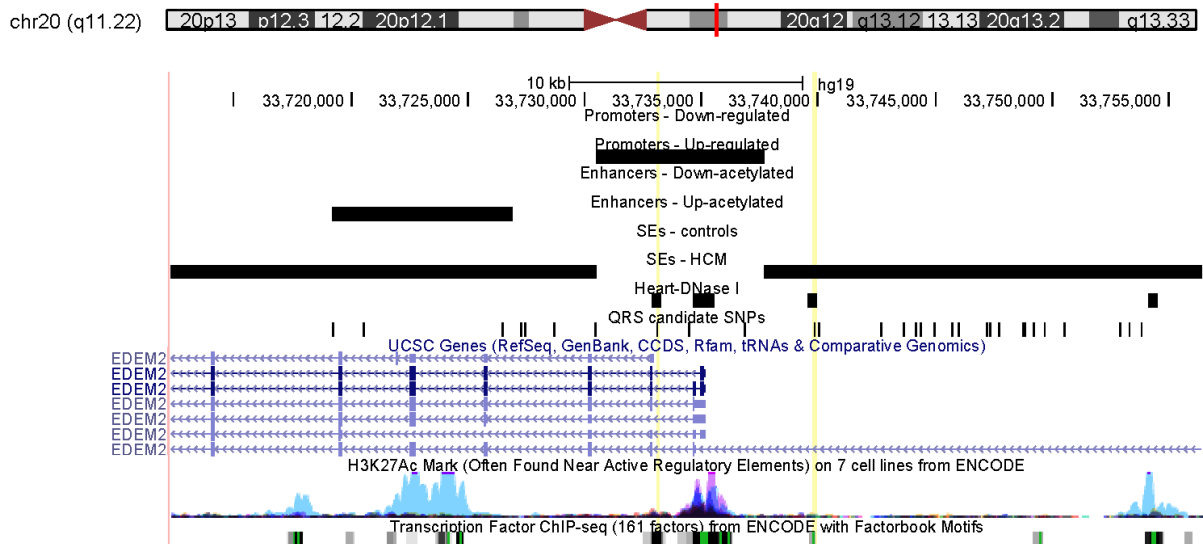

**Supplemental Figure 21.** Loci of lead QRS-associated SNP rs2025096, in which variant rs6060266, in LD  $r^2=0.6$ , overlaps (in yellow) an up-regulated promoter on gene *EDEM2*, while variants rs111275419 and rs6058194, in LD  $r^2=0.6$ , overlap (in yellow) an HCM super-enhancer.

## 1.1 Supplemental Tables

**Supplemental Table 1.** Overview of the 20 QRS-associated loci overlapping regulatory regions of interest. NEA: non-effect allele. EA: effect allele. SE: super-enhancer.

| rsID        | chr  | pos (hg19) | NEA | EA | MAF     | Function   | CADD | GWAS p-value | r <sup>2</sup> | Lead SNP   | promoters down | promoters up | H3K27ac down | H3K27ac up | SE HCM | SE LV | Nearest gene 1 | Nearest gene 2 | Nearest gene 3 | Nearest gene down-regulated in HCM | Nearest gene up-regulated in HCM | eQTL gene |
|-------------|------|------------|-----|----|---------|------------|------|--------------|----------------|------------|----------------|--------------|--------------|------------|--------|-------|----------------|----------------|----------------|------------------------------------|----------------------------------|-----------|
| rs680386    | chr1 | 23695275   | G   | T  | 0.1889  | intronic   | 5.7  |              | 0.6            | rs2849028  | X              |              |              |            |        |       | ZNF436         | C1orf213       | TCEA3          | ZNF436                             |                                  | TCEA3     |
| rs72694106  | chr1 | 51762346   | G   | A  | 0.02386 | intronic   | 4.7  |              | 0.6            | rs17391905 | X              |              |              |            |        |       | TTC39A         | RNF11          | EPS15          | TTC39A                             |                                  |           |
| rs2274316   | chr1 | 1.56E+08   | A   | C  | 0.329   | intronic   | 12.3 |              | 1.0            | rs2274317  |                |              |              |            | X      |       | MEF2D          | C1orf61        | IQGAP3         |                                    |                                  | MEF2D     |
| rs12131289  | chr1 | 1.56E+08   | T   | C  | 0.329   | intronic   | 11.4 |              | 1.0            | rs2274317  |                |              |              |            | X      |       | MEF2D          | C1orf61        | IQGAP3         |                                    |                                  | MEF2D     |
| rs2274317   | chr1 | 1.56E+08   | C   | T  | 0.328   | exonic     |      | 1.82E-11     | 1.0            | rs2274317  |                |              |              |            | X      |       | MEF2D          | C1orf61        | IQGAP3         |                                    |                                  | MEF2D     |
| rs4450010   | chr1 | 1.56E+08   | G   | T  | 0.328   | intronic   |      |              | 1.0            | rs2274317  |                |              |              |            | X      |       | MEF2D          | IQGAP3         | C1orf61        |                                    |                                  | MEF2D     |
| rs1185700   | chr1 | 1.56E+08   | G   | A  | 0.2386  | exonic     | 14.7 |              | 0.6            | rs2274317  |                |              |              |            | X      |       | MEF2D          | IQGAP3         | C1orf61        |                                    |                                  |           |
| rs1925950   | chr1 | 1.56E+08   | A   | G  | 0.327   | exonic     | 11.7 |              | 1.0            | rs2274317  |                |              |              |            | X      |       | MEF2D          | IQGAP3         | C1orf61        |                                    |                                  | MEF2D     |
| rs2274319   | chr1 | 1.56E+08   | C   | T  | 0.325   | intronic   | 2.2  |              | 1.0            | rs2274317  |                |              |              |            | X      |       | MEF2D          | IQGAP3         | C1orf61        |                                    |                                  |           |
| rs3790457   | chr1 | 1.56E+08   | T   | C  | 0.329   | intronic   | 12.0 |              | 1.0            | rs2274317  |                |              |              |            | X      |       | MEF2D          | IQGAP3         | C1orf61        |                                    |                                  | MEF2D     |
| rs12038396  | chr1 | 1.56E+08   | T   | C  | 0.329   | intronic   | 7.3  |              | 1.0            | rs2274317  |                |              |              |            | X      |       | MEF2D          | IQGAP3         | C1orf61        |                                    |                                  | MEF2D     |
| rs3790458   | chr1 | 1.56E+08   | A   | T  | 0.2356  | intronic   | 9.6  |              | 0.6            | rs2274317  |                |              |              |            | X      |       | MEF2D          | IQGAP3         | C1orf61        |                                    |                                  |           |
| rs746527    | chr1 | 1.56E+08   | C   | T  | 0.2356  | intronic   | 15.7 |              | 0.6            | rs2274317  |                |              |              |            | X      |       | MEF2D          | IQGAP3         | C1orf61        |                                    |                                  |           |
| rs3790461   | chr1 | 1.56E+08   | G   | A  | 0.2356  | intronic   | 7.9  |              | 0.6            | rs2274317  |                |              |              |            | X      |       | MEF2D          | IQGAP3         | C1orf61        |                                    |                                  |           |
| rs12136856  | chr1 | 1.56E+08   | G   | C  | 0.327   | intergenic | 12.5 |              | 1.0            | rs2274317  |                |              |              |            | X      |       | MEF2D          | IQGAP3         | C1orf61        |                                    |                                  |           |
| rs538050729 | chr1 | 1.56E+08   | GC  | G  | 0.3489  | intergenic | 12.6 |              | 0.9            | rs2274317  |                |              |              |            | X      |       | MEF2D          | IQGAP3         | C1orf61        |                                    |                                  |           |
| rs1104859   | chr1 | 2.01E+08   | G   | T  | 0.2555  | intronic   | 16.3 |              | 0.6            | rs10920184 |                |              |              |            | X      |       | TNNT2          | LAD1           | PKP1           |                                    |                                  |           |
| rs2365652   | chr1 | 2.01E+08   | A   | C  | 0.3499  | intronic   | 5.1  |              | 1.0            | rs10920184 |                |              |              |            | X      |       | TNNT2          | LAD1           | PKP1           |                                    |                                  |           |
| rs1892026   | chr1 | 2.01E+08   | T   | G  | 0.2565  | intronic   | 2.1  |              | 0.6            | rs10920184 |                |              |              |            | X      |       | TNNT2          | LAD1           | PKP1           |                                    |                                  |           |
| rs3729547   | chr1 | 2.01E+08   | A   | G  | 0.2584  | exonic     | 14.2 |              | 0.6            | rs10920184 |                |              |              |            | X      |       | TNNT2          | LAD1           | PKP1           |                                    |                                  |           |
| rs10800776  | chr1 | 2.01E+08   | C   | T  | 0.2565  | intronic   | 0.6  |              | 0.6            | rs10920184 |                |              |              |            | X      |       | TNNT2          | LAD1           | TNNI1          |                                    |                                  |           |
| rs10920183  | chr1 | 2.01E+08   | G   | A  | 0.3499  | intronic   | 1.8  |              | 1.0            | rs10920184 |                |              |              |            | X      |       | TNNT2          | LAD1           | TNNI1          |                                    |                                  |           |
| rs4915232   | chr1 | 2.01E+08   | T   | C  | 0.4254  | intronic   | 2.1  |              | 0.7            | rs10920184 |                |              |              |            | X      |       | LAD1           | TNNT2          | TNNI1          |                                    |                                  |           |
| rs2252860   | chr2 | 26987481   | A   | G  | 0.4066  | intronic   | 7.6  |              | 0.7            | rs6710065  | X              |              |              |            |        |       | SLC35F6        | CENPA          | KCNK3          | CENPA                              | KCNK3                            | KHK       |
| rs2304337   | chr2 | 26987488   | G   | C  | 0.4056  | intronic   | 5.9  |              | 0.7            | rs6710065  | X              |              |              |            |        |       | SLC35F6        | CENPA          | KCNK3          | CENPA                              | KCNK3                            | KHK       |

|             |       |          |    |     |         |                |      |          |            |           |   |        |         |         |          |               |               |              |
|-------------|-------|----------|----|-----|---------|----------------|------|----------|------------|-----------|---|--------|---------|---------|----------|---------------|---------------|--------------|
| rs34902032  | chr2  | 27084942 | TC | T   | 0.3787  | intronic       | 1.6  | 0.9      | rs6710065  |           | X | DPYSL5 | CENPA   | SLC35F6 | CENPA    |               | KHK           |              |
| rs11677841  | chr2  | 27239949 | T  | G   | 0.3817  | intronic       | 1.3  | 0.5      | rs6710065  |           | X | MAPRE3 | TMEM214 | AGBL5   | AGBL5    |               | KHK           |              |
| rs968702    | chr3  | 53276485 | G  | C   | 0.1779  | intronic       | 0.5  | 0.7      | rs4687718  |           | X | TKT    | DCP1A   | PRKCD   |          | PRKCD,TKT     |               |              |
| rs62256006  | chr3  | 53289634 | G  | A   | 0.164   | intronic       | 12.3 | 0.6      | rs4687718  |           | X | TKT    | DCP1A   | PRKCD   |          | PRKCD,TKT     |               |              |
| rs17523471  | chr3  | 1.85E+08 | T  | C   | 0.3231  | UTR5           | 4.4  | 1.0      | rs10937226 |           | X | SENP2  | LIPH    | IGF2BP2 | LIPH     |               |               |              |
| rs146170154 | chr6  | 36646768 | C  | CTA | 0.173   | intronic       | 8.4  | 0.7      | rs1321311  |           | X |        | CDKN1A  | RAB44   | CPNE5    |               | CPNE5,CDKN1A  |              |
| rs3176326   | chr6  | 36647289 | G  | A   | 0.173   | intronic       | 7.9  | 0.7      | rs1321311  |           | X |        | CDKN1A  | RAB44   | CPNE5    |               | CPNE5,CDKN1A  |              |
| rs6913012   | chr6  | 1.19E+08 | A  | G   | 0.4632  | intronic       | 8.4  | 0.7      | rs11153730 |           | X |        | CEP85L  | PLN     | MCM9     |               | CEP85L        |              |
| rs1003549   | chr7  | 35295491 | T  | C   | 0.1292  | intergenic     | 0.8  | 0.7      | rs1419856  |           | X |        | TBX20   | DPY19L1 | HERPUD2  |               | TBX20,DPY19L1 |              |
| rs2270188   | chr7  | 1.16E+08 | T  | G   | 0.4811  | UTR3           | 11.8 | 0.5      | rs11773845 |           |   | X      | CAV2    | CAV1    | MET      |               |               |              |
| rs2270189   | chr7  | 1.16E+08 | G  | A   | 0.4811  | UTR3           | 7.8  | 0.5      | rs11773845 |           |   | X      | CAV2    | CAV1    | MET      |               |               |              |
| rs4367519   | chr8  | 1.25E+08 | C  | T   | 0.04573 | ncRNA_intronic | 8.9  | 4.15E-11 | 1.0        | rs4367519 |   | X      | KLHL38  | ANXA13  | FBXO32   | FBXO32        |               |              |
| rs143950919 | chr8  | 1.25E+08 | T  | TA  | 0.04573 | ncRNA_intronic | 2.5  |          | 1.0        | rs4367519 |   | X      | KLHL38  | ANXA13  | FBXO32   | FBXO32        |               |              |
| rs11000728  | chr10 | 75404300 | C  | G   | 0.1342  | downstream     | 5.6  |          | 0.8        | rs7099599 |   | X      | SYNPO2L | MYOZ1   | USP54    | SYNPO2L,MYOZ1 | FUT11         |              |
| rs3812629   | chr10 | 75407290 | G  | A   | 0.1332  | exonic         |      |          | 0.8        | rs7099599 |   | X      | SYNPO2L | MYOZ1   | USP54    | SYNPO2L,MYOZ1 | FUT11         |              |
| rs4746139   | chr10 | 75407649 | A  | C   | 0.1332  | exonic         | 0.0  |          | 0.8        | rs7099599 |   | X      | SYNPO2L | MYOZ1   | USP54    | SYNPO2L,MYOZ1 |               |              |
| rs60632610  | chr10 | 75415677 | C  | T   | 0.1372  | exonic         | 32.0 | 0.9      | rs7099599  |           | X |        | SYNPO2L | MYOZ1   | AGAP5    | SYNPO2L,MYOZ1 | FUT11         |              |
| rs2167079   | chr11 | 47270255 | C  | T   | 0.3002  | exonic         | 22.6 |          | 0.8        | rs2269434 |   | X      |         | ACP2    | NR1H3    | DBB2          | NR1H3         | ACP2         |
| rs3758673   | chr11 | 47278917 | C  | T   | 0.2972  | intronic       | 6.7  |          | 0.8        | rs2269434 |   | X      |         | NR1H3   | ACP2     | MADD          | NR1H3         | ACP2         |
| rs1449627   | chr11 | 47290984 | T  | G   | 0.3072  | UTR5           | 6.5  |          | 0.8        | rs2269434 |   | X      |         | MADD    | NR1H3    | ACP2          | NR1H3         | ACP2         |
| rs142960070 | chr11 | 47291817 | T  | TG  | 0.3072  | intronic       | 6.6  |          | 0.8        | rs2269434 |   | X      |         | MADD    | NR1H3    | ACP2          | NR1H3         | ACP2         |
| rs3781622   | chr11 | 47348702 | T  | C   | 0.3072  | intronic       | 1.4  |          | 0.8        | rs2269434 |   | X      | MADD    | MYBPC3  | SPI1     |               | MYBPC3        | ACP2         |
| rs753993    | chr11 | 47349969 | C  | A   | 0.2028  | intronic       | 13.1 |          | 0.5        | rs2269434 |   | X      | MADD    | MYBPC3  | SPI1     |               | MYBPC3        | ACP2,MADD    |
| rs10838693  | chr11 | 47350553 | G  | C   | 0.3101  | intronic       |      |          | 0.9        | rs2269434 |   | X      | MADD    | MYBPC3  | SPI1     |               | MYBPC3        | ACP2         |
| rs4752825   | chr11 | 47352409 | G  | A   | 0.3072  | downstream     | 4.0  |          | 0.8        | rs2269434 |   | X      | MYBPC3  | MADD    | SPI1     |               |               | ACP2         |
| rs11570050  | chr11 | 47371484 | A  | AG  | 0.2942  | intronic       | 1.0  |          | 0.6        | rs2269434 |   | X      | MYBPC3  | SPI1    | MADD     |               |               |              |
| rs7948705   | chr11 | 47447955 | C  | G   | 0.2932  | UTR5           | 8.9  |          | 0.6        | rs2269434 |   | X      |         | PSMC3   | SLC39A13 | RAPSN         |               |              |
| rs11307826  | chr11 | 47448334 | CA | C   | 0.2932  | upstream       | 10.4 |          | 0.6        | rs2269434 |   | X      |         | PSMC3   | SLC39A13 | RAPSN         |               |              |
| rs174538    | chr11 | 61560081 | G  | A   | 0.3131  | UTR5           | 9.2  |          | 0.8        | rs174577  |   | X      |         | TMEM258 | FEN1     | FADS2         | FADS2         | FADS1, FADS2 |
| rs174561    | chr11 | 61582708 | T  | C   | 0.3032  | ncRNA_exonic   | 7.9  |          | 0.8        | rs174577  |   | X      |         | FADS2   | FADS1    | FEN1          | FADS2         | FADS1, FADS2 |
| rs3834458   | chr11 | 61594920 | CT | C   | 0.3459  | Intronic       | 10.9 |          | 0.9        | rs174577  |   | X      |         | FADS2   | FADS1    | FEN1          | FADS2         | FADS1, FADS2 |

|             |       |          |       |   |        |                           |      |     |           |   |   |        |          |          |             |              |
|-------------|-------|----------|-------|---|--------|---------------------------|------|-----|-----------|---|---|--------|----------|----------|-------------|--------------|
| rs5792235   | chr11 | 61596322 | CA    | C | 0.3469 | intronic                  | 9.4  | 0.9 | rs174577  | X |   | FADS2  | FADS1    | FEN1     | FADS2       | FADS1, FADS2 |
| rs99780     | chr11 | 61596633 | C     | T | 0.3579 | intronic:intronic         | 8.6  | 1.0 | rs174577  | X |   | FADS2  | FADS1    | FEN1     | FADS2       | FADS1, FADS2 |
| rs2958153   | chr12 | 57081517 | G     | A | 0.2684 | intronic                  | 5.9  | 0.9 | rs2926743 |   | X | PTGES3 | NACA     | ATP5B    | NACA        |              |
| rs3214051   | chr12 | 57119236 | A     | G | 0.3728 | UTR5                      | 8.2  | 0.6 | rs2926743 | X |   | NACA   | PRIM1    | HSD17B6  | NACA        |              |
| rs8039472   | chr15 | 85361644 | G     | A | 0.4881 | intronic                  | 5.7  | 0.8 | rs7183401 |   | X | ALPK3  | ZNF592   | SLC28A1  |             |              |
| rs4633690   | chr15 | 85361960 | C     | T | 0.4533 | intronic                  | 18.3 | 0.9 | rs7183401 |   | X | ALPK3  | ZNF592   | SLC28A1  |             |              |
| rs2879828   | chr15 | 85361977 | G     | T | 0.4523 | intronic                  | 15.8 | 1.0 | rs7183401 |   | X | ALPK3  | ZNF592   | SLC28A1  |             |              |
| rs871014    | chr17 | 27945339 | C     | T | 0.492  | ncRNA_intronic            | 7.2  | 0.5 | rs7211246 | X |   | CORO6  | ANKRD13B | SSH2     | CORO6       |              |
| rs3760456   | chr17 | 27948844 | C     | T | 0.4463 | ncRNA_exonic              | 7.4  | 0.6 | rs7211246 | X |   | CORO6  | SSH2     | ANKRD13B | CORO6       |              |
| rs2617865   | chr17 | 28049804 | T     | G | 0.4742 | intronic                  | 15.5 | 0.8 | rs7211246 |   | X | SSH2   | CORO6    | ANKRD13B | CORO6       |              |
| rs2628179   | chr17 | 28071796 | C     | G | 0.4612 | intronic                  | 5.3  | 0.7 | rs7211246 |   | X | SSH2   | CORO6    | ANKRD13B | CORO6       |              |
| rs4795529   | chr17 | 28443549 | A     | G | 0.4652 | ncRNA_intronic            | 5.5  | 0.9 | rs7211246 | X |   | NSRP1  | EFCAB5   | SLC6A4   | NSRP1       |              |
| rs6505162   | chr17 | 28444183 | A     | C | 0.4414 | ncRNA_exonic:ncRNA_exonic |      | 0.8 | rs7211246 | X |   | NSRP1  | EFCAB5   | SLC6A4   | NSRP1       |              |
| rs8067576   | chr17 | 28444254 | T     | A | 0.4354 | ncRNA_intronic            | 15.6 | 1.0 | rs7211246 | X |   | NSRP1  | EFCAB5   | SLC6A4   | NSRP1       |              |
| rs530081    | chr18 | 32621231 | G     | A | 0.33   | intronic                  |      | 0.6 | rs617759  | X |   | MAPRE2 | DTNA     | ZNF397   | MAPRE2      |              |
| rs6060266   | chr20 | 33733078 | T     | C | 0.2266 | intronic                  | 9.1  | 0.6 | rs2025096 |   | X | EDEM2  | PROCR    | TRPC4AP  | PROCR,EDEM2 | PROCR,EDEM2  |
| rs111275419 | chr20 | 33739804 | CCCAT | C | 0.2286 | intronic                  | 15.8 | 0.6 | rs2025096 |   | X | EDEM2  | PROCR    | TRPC4AP  | PROCR,EDEM2 | PROCR,EDEM2  |
| rs6058194   | chr20 | 33739831 | G     | A | 0.2276 | intronic                  | 20.1 | 0.6 | rs2025096 |   | X | EDEM2  | PROCR    | TRPC4AP  | PROCR,EDEM2 | PROCR,EDEM2  |

**Supplemental Table 2.** RNA-seq quality control measures.

| Sample name             | Number of input reads | Uniquely mapped reads %     | Overall quality assessment                                                                                                                                                                                                                                                                                                                                                                                                                                                                                                                                                                                                                                                                                                                                                                                                                                                                                     |                 |      |                             |               |                    |           |                        |                                                                                                                             |                         |     |                        |           |      |                |              |      |                 |     |       |       |     |     |
|-------------------------|-----------------------|-----------------------------|----------------------------------------------------------------------------------------------------------------------------------------------------------------------------------------------------------------------------------------------------------------------------------------------------------------------------------------------------------------------------------------------------------------------------------------------------------------------------------------------------------------------------------------------------------------------------------------------------------------------------------------------------------------------------------------------------------------------------------------------------------------------------------------------------------------------------------------------------------------------------------------------------------------|-----------------|------|-----------------------------|---------------|--------------------|-----------|------------------------|-----------------------------------------------------------------------------------------------------------------------------|-------------------------|-----|------------------------|-----------|------|----------------|--------------|------|-----------------|-----|-------|-------|-----|-----|
| HCM_1                   | 18147501              | 88.07%                      | 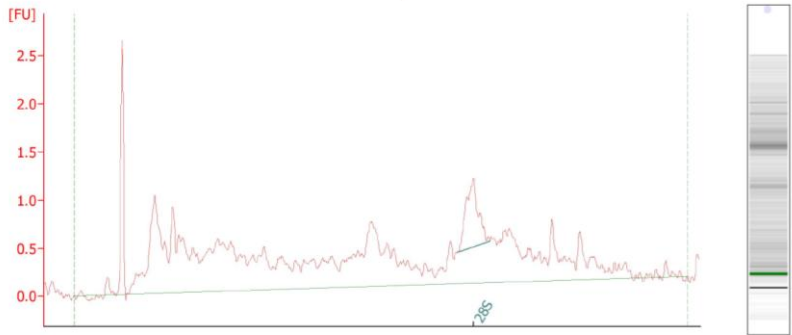 <p><b>Overall Results for sample</b></p> <table border="0"> <tr> <td>RNA Area:</td> <td>35.1</td> <td>RNA Integrity Number (RIN):</td> <td>2.7 (B.02.08)</td> </tr> <tr> <td>RNA Concentration:</td> <td>559 pg/ul</td> <td>Result Flagging Color:</td> <td><span style="background-color: #ccccff; border: 1px solid black; display: inline-block; width: 15px; height: 10px;"></span></td> </tr> <tr> <td>rRNA Ratio [28s / 18s]:</td> <td>0.0</td> <td>Result Flagging Label:</td> <td>RIN: 2.70</td> </tr> </table> <p><b>Fragment table for sample</b></p> <table border="1"> <thead> <tr> <th>Name</th> <th>Start Time [s]</th> <th>End Time [s]</th> <th>Area</th> <th>% of total Area</th> </tr> </thead> <tbody> <tr> <td>28S</td> <td>42.73</td> <td>44.93</td> <td>1.6</td> <td>4.5</td> </tr> </tbody> </table> | RNA Area:       | 35.1 | RNA Integrity Number (RIN): | 2.7 (B.02.08) | RNA Concentration: | 559 pg/ul | Result Flagging Color: | <span style="background-color: #ccccff; border: 1px solid black; display: inline-block; width: 15px; height: 10px;"></span> | rRNA Ratio [28s / 18s]: | 0.0 | Result Flagging Label: | RIN: 2.70 | Name | Start Time [s] | End Time [s] | Area | % of total Area | 28S | 42.73 | 44.93 | 1.6 | 4.5 |
| RNA Area:               | 35.1                  | RNA Integrity Number (RIN): | 2.7 (B.02.08)                                                                                                                                                                                                                                                                                                                                                                                                                                                                                                                                                                                                                                                                                                                                                                                                                                                                                                  |                 |      |                             |               |                    |           |                        |                                                                                                                             |                         |     |                        |           |      |                |              |      |                 |     |       |       |     |     |
| RNA Concentration:      | 559 pg/ul             | Result Flagging Color:      | <span style="background-color: #ccccff; border: 1px solid black; display: inline-block; width: 15px; height: 10px;"></span>                                                                                                                                                                                                                                                                                                                                                                                                                                                                                                                                                                                                                                                                                                                                                                                    |                 |      |                             |               |                    |           |                        |                                                                                                                             |                         |     |                        |           |      |                |              |      |                 |     |       |       |     |     |
| rRNA Ratio [28s / 18s]: | 0.0                   | Result Flagging Label:      | RIN: 2.70                                                                                                                                                                                                                                                                                                                                                                                                                                                                                                                                                                                                                                                                                                                                                                                                                                                                                                      |                 |      |                             |               |                    |           |                        |                                                                                                                             |                         |     |                        |           |      |                |              |      |                 |     |       |       |     |     |
| Name                    | Start Time [s]        | End Time [s]                | Area                                                                                                                                                                                                                                                                                                                                                                                                                                                                                                                                                                                                                                                                                                                                                                                                                                                                                                           | % of total Area |      |                             |               |                    |           |                        |                                                                                                                             |                         |     |                        |           |      |                |              |      |                 |     |       |       |     |     |
| 28S                     | 42.73                 | 44.93                       | 1.6                                                                                                                                                                                                                                                                                                                                                                                                                                                                                                                                                                                                                                                                                                                                                                                                                                                                                                            | 4.5             |      |                             |               |                    |           |                        |                                                                                                                             |                         |     |                        |           |      |                |              |      |                 |     |       |       |     |     |
| HCM_3                   | 17069996              | 89.39%                      |                                                                                                                                                                                                                                                                                                                                                                                                                                                                                                                                                                                                                                                                                                                                                                                                                                                                                                                |                 |      |                             |               |                    |           |                        |                                                                                                                             |                         |     |                        |           |      |                |              |      |                 |     |       |       |     |     |
| HCM_5                   | 14616054              | 87.30%                      |                                                                                                                                                                                                                                                                                                                                                                                                                                                                                                                                                                                                                                                                                                                                                                                                                                                                                                                |                 |      |                             |               |                    |           |                        |                                                                                                                             |                         |     |                        |           |      |                |              |      |                 |     |       |       |     |     |

HCM\_6

17987731

86.79%

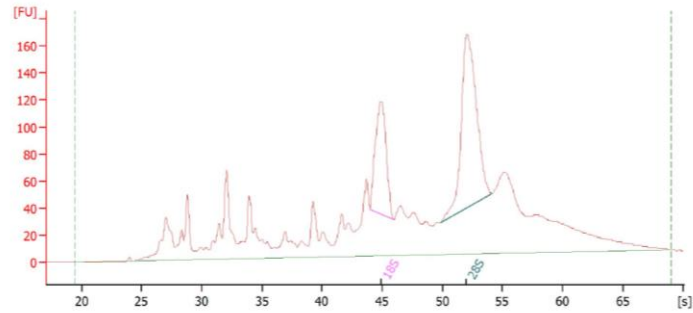

**Overall Results for sample**

RNA Area: 2.611.1      RNA Integrity Number (RIN): 7.1 (B.02.08)  
RNA Concentration: 789,798 pg/μl      Result Flagging Color:    
rRNA Ratio [28s / 18s]: 1.8      Result Flagging Label: RIN: 7.10

**Fragment table for sample**

| Name | Start Time [s] | End Time [s] | Area  | % of total Area |
|------|----------------|--------------|-------|-----------------|
| 18S  | 44.00          | 45.95        | 194.1 | 7.4             |
| 28S  | 49.85          | 54.10        | 355.7 | 13.6            |

HCM\_7

16020022

87.72%

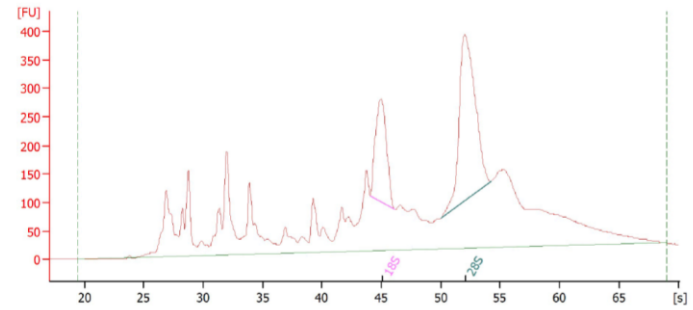

**Overall Results for sample**

RNA Area: 6,674.7      RNA Integrity Number (RIN): 6.9 (B.02.08)  
RNA Concentration: 2,018,930 pg/μl      Result Flagging Color:    
rRNA Ratio [28s / 18s]: 2.0      Result Flagging Label: RIN: 6.90

**Fragment table for sample**

| Name | Start Time [s] | End Time [s] | Area  | % of total Area |
|------|----------------|--------------|-------|-----------------|
| 18S  | 44.05          | 46.10        | 438.3 | 6.6             |
| 28S  | 50.00          | 54.20        | 859.1 | 12.9            |



HCM\_8

15764338 85.76%

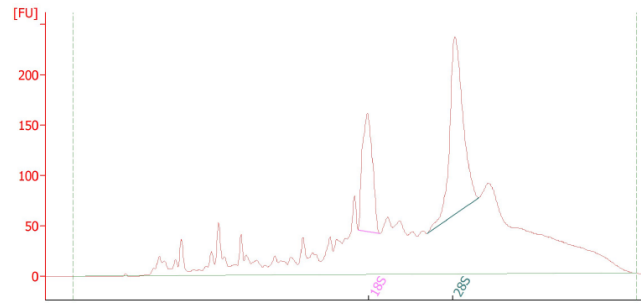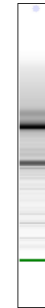

**Overall Results for sample**

RNA Area: 3,511.5 RNA Integrity Number (RIN): 7.1 (B.02.08)  
RNA Concentration: 17,631 pg/ul Result Flagging Color:    
rRNA Ratio [28s / 18s]: 1.7 Result Flagging Label: RIN: 7.10

**Fragment table for sample**

| Name | Start Time [s] | End Time [s] | Area  | % of total Area |
|------|----------------|--------------|-------|-----------------|
| 18S  | 40.67          | 42.40        | 265.0 | 7.5             |
| 28S  | 46.19          | 50.34        | 449.6 | 12.8            |

HCM\_9

17169707 87.59%

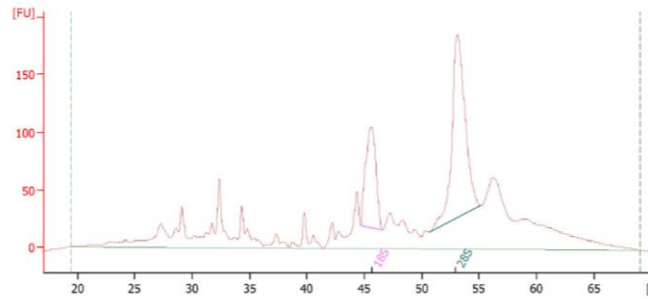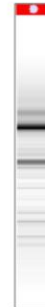

**Overall Results for sample**

RNA Area: 2,214.9 RNA Integrity Number (RIN): 7.9 (B.02.08)  
RNA Concentration: 669,953 pg/ul Result Flagging Color:    
rRNA Ratio [28s / 18s]: 2.0 Result Flagging Label: RIN: 7.90

**Fragment table for sample**

| Name | Start Time [s] | End Time [s] | Area  | % of total Area |
|------|----------------|--------------|-------|-----------------|
| 18S  | 44.70          | 46.60        | 198.1 | 8.9             |
| 28S  | 50.70          | 55.15        | 397.9 | 18.0            |

HCM\_10                      16954945      85.81%

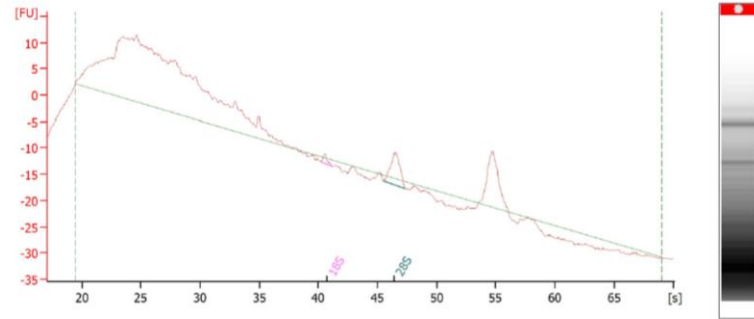

**Overall Results for sample**  
 RNA Area: 449.9                      RNA Integrity Number (RIN): N/A (B.02.08)  
 RNA Concentration: 136,074 pg/ul      Result Flagging Color:   
 rRNA Ratio [28s / 18s]: 7.2                      Result Flagging Label: RIN N/A

**Fragment table for sample**

| Name | Start Time [s] | End Time [s] | Area | % of total Area |
|------|----------------|--------------|------|-----------------|
| 18S  | 40.20          | 41.20        | 1.7  | 0.4             |
| 28S  | 45.50          | 47.35        | 12.0 | 2.7             |

HCM\_11                      16177356      85.31%

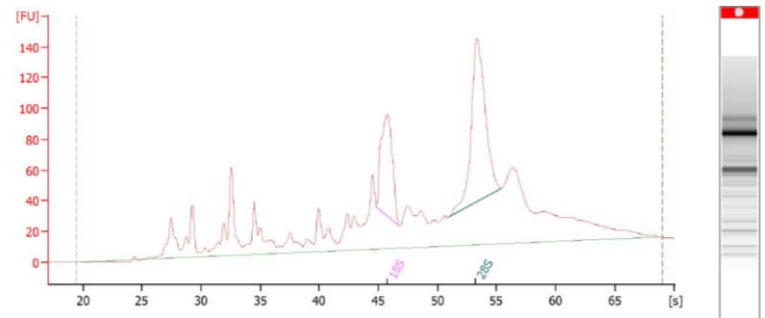

**Overall Results for sample**  
 RNA Area: 1,931.8                      RNA Integrity Number (RIN): N/A (B.02.08)  
 RNA Concentration: 584,334 pg/ul      Result Flagging Color:   
 rRNA Ratio [28s / 18s]: 1.7                      Result Flagging Label: RIN N/A

**Fragment table for sample**

| Name | Start Time [s] | End Time [s] | Area  | % of total Area |
|------|----------------|--------------|-------|-----------------|
| 18S  | 44.85          | 46.80        | 160.1 | 8.3             |
| 28S  | 50.95          | 55.40        | 271.6 | 14.1            |

HCM\_12 17130387 88.70%

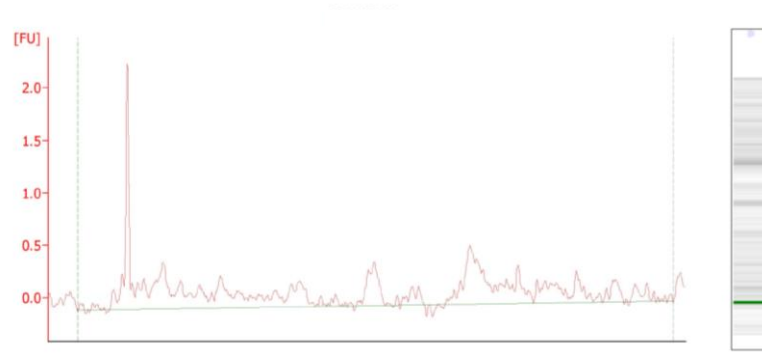

**Overall Results for sample:**  
 RNA Area: 15.6 RNA Integrity Number (RIN): 1.9 (B.02.08)  
 RNA Concentration: 248 pg/μl Result Flagging Color:    
 rRNA Ratio [28s / 18s]: 0.0 Result Flagging Label: RIN: 1.90

HCM\_14 16904754 85.43%

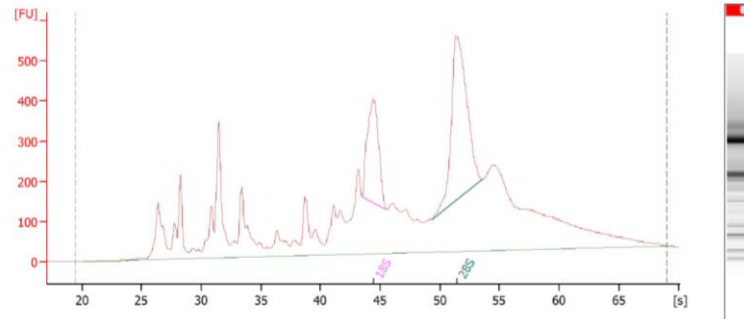

**Overall Results for sample:**  
 RNA Area: 9,660.9 RNA Integrity Number (RIN): 6.8 (B.02.08)  
 RNA Concentration: 2,922,198 pg/μl Result Flagging Color:    
 rRNA Ratio [28s / 18s]: 1.9 Result Flagging Label: RIN: 6.80

**Fragment table for sample**

| Name | Start Time [s] | End Time [s] | Area    | % of total Area |
|------|----------------|--------------|---------|-----------------|
| 18S  | 43.50          | 45.50        | 636.6   | 6.6             |
| 28S  | 49.35          | 53.55        | 1,178.9 | 12.2            |

CONTROL\_RNA\_1† 17324505 55.79%

--

CONTROL\_RNA\_2 16741601 89.21%

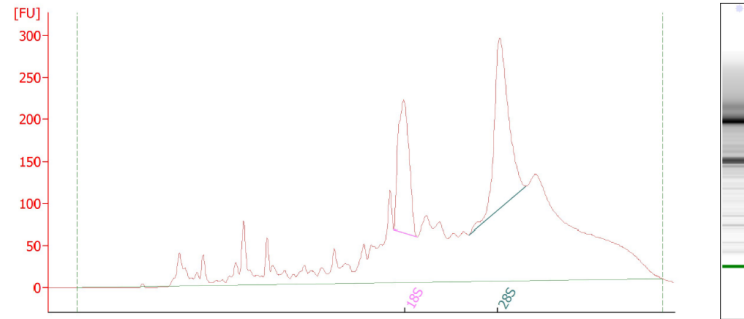

**Overall Results for sample**

RNA Area: 4,520.5 RNA Integrity Number (RIN): 6.8 (B.02.08)  
 RNA Concentration: 13,847 pg/μl Result Flagging Color:    
 rRNA Ratio [28s / 18s]: 1.4 Result Flagging Label: RIN: 6.80

**Fragment table for sample**

| Name | Start Time [s] | End Time [s] | Area  | % of total Area |
|------|----------------|--------------|-------|-----------------|
| 18S  | 40.70          | 42.46        | 361.4 | 8.0             |
| 28S  | 46.33          | 50.56        | 512.0 | 11.3            |

CONTROL\_RNA\_3† 16142540 90.28%

CONTROL\_RNA\_4† 21129003 87.89%

--

--

CONTROL\_RNA\_5 16650887 86.20%

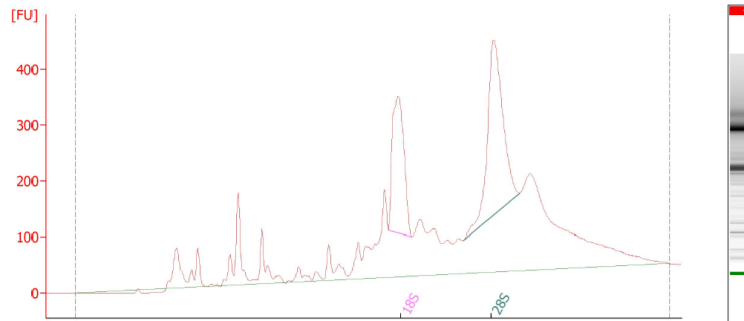

**Overall Results for sample**

RNA Area: 5,805.4 RNA Integrity Number (RIN): N/A (B.02.08)  
 RNA Concentration: 17,783 pg/μl Result Flagging Color:    
 rRNA Ratio [28s / 18s]: 1.4 Result Flagging Label: RIN N/A

**Fragment table for sample**

| Name | Start Time [s] | End Time [s] | Area  | % of total Area |
|------|----------------|--------------|-------|-----------------|
| 18S  | 40.62          | 42.35        | 590.4 | 10.2            |
| 28S  | 46.18          | 50.32        | 841.2 | 14.5            |

CONTROL\_RNA\_6 18140395 86.31%

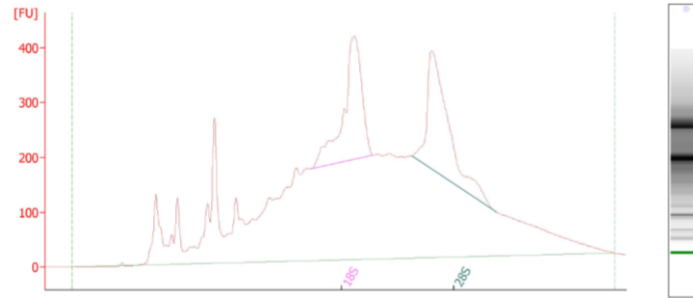

**Overall Results for sample**

|                         |              |                             |                                                                                          |
|-------------------------|--------------|-----------------------------|------------------------------------------------------------------------------------------|
| RNA Area:               | 11,912.3     | RNA Integrity Number (RIN): | 6.1 (B.02.08)                                                                            |
| RNA Concentration:      | 75,352 pg/ul | Result Flagging Color:      | <span style="background-color: #ccccff; border: 1px solid black; padding: 2px;"> </span> |
| rRNA Ratio [28s / 18s]: | 1.0          | Result Flagging Label:      | RIN: 6.10                                                                                |

**Fragment table for sample**

| Name | Start Time [s] | End Time [s] | Area  | % of total Area |
|------|----------------|--------------|-------|-----------------|
| 18S  | 37.69          | 42.99        | 982.2 | 8.2             |
| 28S  | 46.15          | 53.19        | 943.5 | 7.9             |

CONTROL\_RNA\_7+ 19381202 86.81%

--

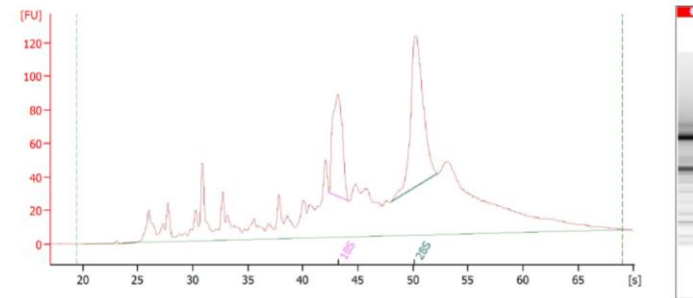

**Overall Results for sample:**

|                         |               |                             |                                                                                          |
|-------------------------|---------------|-----------------------------|------------------------------------------------------------------------------------------|
| RNA Area:               | 1,883.8       | RNA Integrity Number (RIN): | 7 (B.02.08)                                                                              |
| RNA Concentration:      | 589,812 pg/ul | Result Flagging Color:      | <span style="background-color: #ccccff; border: 1px solid black; padding: 2px;"> </span> |
| rRNA Ratio [28s / 18s]: | 1.6           | Result Flagging Label:      | RIN:7                                                                                    |

**Fragment table for sample**

| Name | Start Time [s] | End Time [s] | Area  | % of total Area |
|------|----------------|--------------|-------|-----------------|
| 18S  | 42.35          | 44.15        | 144.1 | 7.7             |
| 28S  | 48.00          | 52.30        | 237.3 | 12.6            |

CONTROL\_RNA\_9+ 16682602 84.56%

--

CONTROL\_RNA\_10+ 15953144 86.26%

--

CONTROL\_RNA\_11 16622707 85.93%

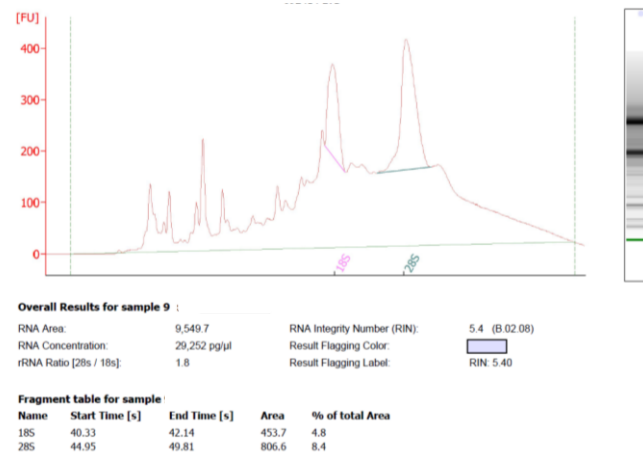

†: due to very limited size, all tissues were used for RNA-seq and no RNA left for other purposes.

**Supplemental Table 3.** Raw read counts and Reads Per Kilobase per Million (RPKM) values from the RNA-seq analysis in HCM patients and controls.

Available as .xlsx file.

**Supplemental Table 4.** Differentially regulated genes identified by RNA-seq experiment in HCM patients versus controls.

Available as .xlsx file.

**Supplemental Table 5.** Differentially acetylated regions identified by ChIP-seq experiment in HCM patients versus controls (positions in hg19).

Available as .xlsx file.

**Supplemental Table 6.** HCM-specific super-enhancer regions, not overlapping with LV super-enhancers (positions in hg19).

Available as .xlsx file.

**Supplemental Table 7.** Summary of the functional annotation using differential regulatory elements in HCM patients versus controls.

| Locus   | Lead QRS-associated SNP | Genes from original study | # LD SNPs overlapping exons with CADD > 12.37 | # LD SNPs overlapping differentially regulated promoters in HCM x controls | # LD SNPs overlapping differentially acetylated regions in HCM x controls | # LD SNPs overlapping HCM or LV super-enhancers | Genes from this study    |
|---------|-------------------------|---------------------------|-----------------------------------------------|----------------------------------------------------------------------------|---------------------------------------------------------------------------|-------------------------------------------------|--------------------------|
| 1p36.12 | rs2849028               | ZNF436; C1orf213          |                                               |                                                                            | 1                                                                         |                                                 | ZNF436; TCEA3            |
| 1p32.3  | rs17391905              | CDKN2C                    |                                               |                                                                            | 1                                                                         |                                                 | TTC39A                   |
| 1p31.3  | rs2207790               | NFIA                      |                                               |                                                                            |                                                                           |                                                 |                          |
| 1p13.1  | rs12039739              | CASQ2                     |                                               |                                                                            |                                                                           |                                                 |                          |
| 1q22    | rs2274317               | MEF2D                     | 1                                             |                                                                            |                                                                           | 14                                              | MEF2D                    |
| 1q23.3  | rs12036340              | OLFML2B                   |                                               |                                                                            |                                                                           |                                                 |                          |
| 1q32.1  | rs10920184              | TNNT2                     | 1                                             |                                                                            |                                                                           | 7                                               | TNNT2                    |
| 1q32.1  | rs4288653               | PLEKHA6                   |                                               |                                                                            |                                                                           |                                                 |                          |
| 2p23.3  | rs6710065               | DPYSL5                    | 1                                             | 2                                                                          | 2                                                                         |                                                 | CENPA; AGBL5; KCNK3; KHK |
| 2p22.2  | rs3770770               | STRN                      |                                               |                                                                            |                                                                           |                                                 |                          |
| 2q31.2  | rs3816849               | TTN                       |                                               |                                                                            |                                                                           |                                                 |                          |
| 3p22.2  | rs6801957               | SCN10A                    |                                               |                                                                            |                                                                           |                                                 |                          |
| 3p21.1  | rs4687718               | TKT                       |                                               | 2                                                                          | 2                                                                         |                                                 | PRKCD;TKT                |
| 3p14.1  | rs2242285               | LRIG1                     |                                               |                                                                            |                                                                           |                                                 |                          |
| 3p14.1  | rs13314892              | MITF                      |                                               |                                                                            |                                                                           |                                                 |                          |
| 3q27.2  | rs10937226              | SENP2                     |                                               |                                                                            |                                                                           | 1                                               | LIPH                     |
| 4p15.31 | rs1344852               | SLIT2                     |                                               |                                                                            |                                                                           |                                                 |                          |
| 5q33.2  | rs13185595              | HAND1                     |                                               |                                                                            |                                                                           |                                                 |                          |
| 6p21.31 | rs1321311               | CDKN1A                    |                                               | 2                                                                          |                                                                           |                                                 | CPNE5; CDKN1A            |
| 6p21.1  | rs1015150               | TFEB                      |                                               |                                                                            |                                                                           |                                                 |                          |
| 6q22.31 | rs11153730              | PLN;SLC35F1;CEP85L        |                                               | 1                                                                          |                                                                           |                                                 | CEP85L                   |
| 7p14.3  | rs1419856               | TBX20                     |                                               | 1                                                                          |                                                                           |                                                 | TBX20; DPY19L1           |
| 7p12.3  | rs6968945               | TNS3                      |                                               |                                                                            |                                                                           |                                                 |                          |
| 7q31.2  | rs11773845              | CAV1                      |                                               |                                                                            |                                                                           | 2                                               |                          |
| 8q24.13 | rs4367519               | FBXO32;KLHL38             | 1                                             |                                                                            |                                                                           |                                                 |                          |

|          |                       |                        |   |   |   |                             |
|----------|-----------------------|------------------------|---|---|---|-----------------------------|
| 8q24.13  | rs10105974            | MTSS1                  |   |   |   |                             |
| 10q21.1  | rs1733724             | DKK1                   |   |   |   |                             |
| 10q21.3  | rs12414364;rs10509289 | CTNNA3                 |   |   |   |                             |
| 10q22.2  | rs7099599             | SYNPO2L;SEC24C;CAMK2G  | 2 | 1 |   | 3 SYNPO2L; MYOZ1; FUT11     |
| 10q25.2  | rs7918405             | VTI1A                  |   |   |   |                             |
| 11p11.2  | rs2269434             | ACP2;MADD;MYBPC3;NR1H3 | 1 | 4 | 2 | 5 ACP2; MADD; MYBPC3; NR1H3 |
| 11q12.2  | rs174577              | FADS2;TMEM258          |   | 5 |   | FADS1; FADS2                |
| 12q13.13 | rs736825              | HOXC5;HOXC4;HOXC6      |   |   |   |                             |
| 12q13.3  | rs2926743             | NACA                   | 3 | 1 | 1 |                             |
| 12q24.21 | rs7132327             | TBX3                   |   |   |   |                             |
| 13q14.13 | rs1408224             | LRCH1                  |   |   |   |                             |
| 13q22.1  | rs728926              | KLF12                  |   |   |   |                             |
| 14q24.2  | rs12880291            | SIPA1L1                |   |   |   |                             |
| 15q25.3  | rs7183401             | ALPK3                  |   |   |   | 3                           |
| 15q26.3  | rs8038015             | IGF1R                  |   |   |   |                             |
| 16q23.3  | rs6565060             | CDH13                  |   |   |   |                             |
| 17q11.2  | rs7211246             | NSRP1;EFCAB5           |   | 5 |   | 2 NSRP1; CORO6              |
| 17q21.31 | rs242562              | MAPT                   |   |   |   |                             |
| 17q24.2  | rs9912468             | PRKCA                  |   |   |   |                             |
| 18q12.1  | rs617759              | MAPRE2                 |   | 1 |   | MAPRE2                      |
| 18q12.2  | rs879568              | FHOD3                  | 3 |   |   |                             |
| 18q12.3  | rs10853525            | SETBP1                 |   |   |   |                             |
| 20p12.3  | rs3929778             | BMP2                   |   |   |   |                             |
| 20q11.22 | rs2025096             | MYH7B;GSS;EDEM2        | 1 |   |   | 2 PROCR; EDEM2              |
| 21q21.1  | rs7283707             | USP25                  |   |   |   |                             |
| 21q21.3  | rs13047360            | ADAMTS5                |   |   |   |                             |



## References

1. Dobin A, et al. STAR: ultrafast universal RNA-seq aligner. *Bioinformatics*. 2013;29:15-21.
2. Tarasov A, et al. Sambamba: fast processing of NGS alignment formats. *Bioinformatics*. 2015;31:2032-2034.
3. Anders S, et al. HTSeq--a Python framework to work with high-throughput sequencing data. *Bioinformatics*. 2015;31:166-169.
4. Robinson MD, et al. edgeR: a Bioconductor package for differential expression analysis of digital gene expression data. *Bioinformatics*. 2010;26:139-140.
5. Love MI, et al. Moderated estimation of fold change and dispersion for RNA-seq data with DESeq2. *Genome Biol*. 2014;15:550.
6. Kinsella RJ, et al. Ensembl BioMart: a hub for data retrieval across taxonomic space. *Database (Oxford)*. 2011;2011:bar030.
7. Eijkelenboom A, et al. Genome-wide analysis of FOXO3 mediated transcription regulation through RNA polymerase II profiling. *Mol Syst Biol*. 2013;9:638.
8. Li H, et al. Fast and accurate short read alignment with Burrows-Wheeler transform. *Bioinformatics*. 2009;25:1754-1760.
9. Li H, et al. The Sequence Alignment/Map format and SAMtools. *Bioinformatics*. 2009;25:2078-2079.
10. Zhang Y, et al. Model-based analysis of ChIP-Seq (MACS). *Genome Biol*. 2008;9:R137.
11. Kharchenko PV, et al. Design and analysis of ChIP-seq experiments for DNA-binding proteins. *Nat Biotechnol*. 2008;26:1351-1359.
12. Ross-Innes CS, et al. Differential oestrogen receptor binding is associated with clinical outcome in breast cancer. *Nature*. 2012;481:389-393.

13. Whyte WA, et al. Master transcription factors and mediator establish super-enhancers at key cell identity genes. *Cell*. 2013;153:307-319.
14. Quinlan AR, et al. BEDTools: a flexible suite of utilities for comparing genomic features. *Bioinformatics*. 2010;26:841-842.
15. Neph S, et al. BEDOPS: high-performance genomic feature operations. *Bioinformatics*. 2012;28:1919-1920.
16. Wei Y, et al. SEA: a super-enhancer archive. *Nucleic Acids Res*. 2016;44:D172-179.
17. Watanabe K, et al. Functional mapping and annotation of genetic associations with FUMA. *Nat Commun*. 2017;8:1826.
18. International HapMap C, et al. A second generation human haplotype map of over 3.1 million SNPs. *Nature*. 2007;449:851-861.
19. Maurano MT, et al. Systematic localization of common disease-associated variation in regulatory DNA. *Science*. 2012;337:1190-1195.
20. Mokry M, et al. Many inflammatory bowel disease risk loci include regions that regulate gene expression in immune cells and the intestinal epithelium. *Gastroenterology*. 2014;146:1040-1047.
21. Team RC R: A language and environment for statistical computing. 2015.
22. Kent WJ, et al. The human genome browser at UCSC. *Genome Res*. 2002;12:996-1006.
23. Consortium EP An integrated encyclopedia of DNA elements in the human genome. *Nature*. 2012;489:57-74.
